# Supplementary material
Source: PubMed Central journal article supplement (PMC10582785)
Supplement: jama-e2319597-s002.pdf [file jama-e2319597-s002.pdf]

# Supplemental Online Content

Blue L, Kranker K, Markovitz AR, et al. Effects of the Million Hearts Model on Myocardial Infarctions, Strokes, and Medicare Spending. *JAMA*. Published online October 17, 2023.  
doi:10.1001/jama.2023.19597

## Supplement 2. eMethods

This supplemental material has been provided by the authors to give readers additional information about their work.

## Supplement

|    |                                                                                                                  |    |
|----|------------------------------------------------------------------------------------------------------------------|----|
| 1  |                                                                                                                  |    |
| 2  |                                                                                                                  |    |
| 3  | Effects of the Million Hearts Model on Myocardial Infarctions, Strokes and Medicare Spending:                    |    |
| 4  | Randomized Clinical Trial                                                                                        |    |
| 5  | <b>eMethods 1.</b> Minimization procedure the Centers for Medicare & Medicaid Services used to allocate          |    |
| 6  | organizations to the intervention and control groups.....                                                        | 2  |
| 7  | <b>eMethods 2.</b> Identifying beneficiaries to include in the study population .....                            | 3  |
| 8  | <b>eMethods 3.</b> Outcome definitions .....                                                                     | 4  |
| 9  | <b>eMethods 4.</b> Additional restrictions when identifying the population used to analyze Medicare spending     |    |
| 10 | for first-time CVD events .....                                                                                  | 10 |
| 11 | <b>eMethods 5.</b> Covariates included in regression models.....                                                 | 11 |
| 12 | <b>eMethods 6.</b> Identifying and analyzing outcomes among beneficiaries attributed to intervention and         |    |
| 13 | control organizations .....                                                                                      | 15 |
| 14 | <b>eFigure 1.</b> Flow of organizations and attributed beneficiaries from randomization through analysis .....   | 17 |
| 15 | <b>eTable 1.</b> Characteristics of organizations that entered at least one beneficiary in the Million Hearts    |    |
| 16 | Model (2017–2018) versus those that were randomized but did not enter beneficiaries into the model.....          | 17 |
| 17 | <b>eTable 2.</b> Baseline characteristics of Medicare beneficiaries entered into the model in 2017 or 2018       |    |
| 18 | (with high, medium, or low CVD risk) versus beneficiaries attributed but not entered into the model .....        | 20 |
| 19 | <b>eTable 3.</b> Effects of the Million Hearts Model on deaths, by cause, within four years of model entry ..... | 22 |
| 20 | <b>eTable 4.</b> Effects of the Million Hearts Model on first-time myocardial infarctions and strokes using      |    |
| 21 | alternative claims-based definitions.....                                                                        | 23 |
| 22 | <b>eTable 5.</b> Effects of the Million Hearts Model on binary measures of health events (logistic regression    |    |
| 23 | results) .....                                                                                                   | 24 |
| 24 | <b>eTable 6.</b> Effects of the Million Hearts Model on primary and secondary study outcomes for the             |    |
| 25 | trimmed population, mimicking the control group’s 20-practitioner cap in the intervention group.....             | 26 |
| 26 | <b>eTable 7.</b> Effects of the Million Hearts Model on primary and secondary study outcomes among               |    |
| 27 | attributed beneficiaries .....                                                                                   | 29 |
| 28 | <b>eFigure 2.</b> Assessment of the influence of Covid-19 on CVD events: County-level CVD event rates            |    |
| 29 | declined similarly in 2020–2021 across the intervention and control group beneficiaries’ counties,               |    |
| 30 | relative to the average rates in 2018 and 2019 (beneficiaries ages 40 to 79).....                                | 32 |
| 31 | <b>eFigure 3.</b> Assessment of the influence of Covid-19 on the death rate: The county-level death rate         |    |
| 32 | declined similarly in 2020–2021 across the intervention and control group beneficiaries’ counties,               |    |
| 33 | relative to the average rates in 2018 and 2019 (beneficiaries ages 40 to 79).....                                | 34 |
| 34 | <b>eFigure 4.</b> Assessment of the influence of Covid-19 on Medicare spending: County-level Parts A and B       |    |
| 35 | spending (per capita) declined similarly in 2020–2021 across the intervention and control group                  |    |
| 36 | beneficiaries’ counties, relative to the average rates in 2018 and 2019 (beneficiaries ages 40 to 79).....       | 36 |
| 37 | <b>eTable 8.</b> Projected influence of Covid-19 on Million Hearts Model effect estimates .....                  | 38 |
| 38 | <b>References</b> .....                                                                                          | 39 |

39 **eMethods 1. Minimization procedure the Centers for Medicare & Medicaid Services used**  
40 **to allocate organizations to the intervention and control groups**

41 When organizations joined the Million Hearts<sup>®</sup> Cardiovascular Disease (CVD) Risk Reduction Model, they agreed  
42 to be randomly assigned to the intervention group or the control (usual care) group. The Centers for Medicare &  
43 Medicaid Services (CMS) used a minimization procedure to randomly allocate the 516 participating organizations to  
44 the intervention group (260 organizations) and the control group (256 organizations). This minimization procedure  
45 ensured (1) a roughly equal number of intervention and control organizations; and (2) balance between the two  
46 groups on organizations' region in the United States, number of sites (physical locations where beneficiaries are  
47 seen), number of practitioners, and anticipated number of Medicare fee-for-service (FFS) beneficiaries.  
48 Randomization was conducted once, in April 2016, by an independent CMS contractor (NORC at the University of  
49 Chicago). The procedure went as follows:

- 50 1. Assign all 516 organizations a random number from the uniform distribution.
- 51 2. Sort the organizations according to the random number.
- 52 3. Randomly assign the first 78 organizations (15%) to the intervention or control group.
  - 53 3.1. Assign organization 1 to the control group.
  - 54 3.2. Assign organization 2 to the intervention group.
  - 55 3.3. Assign organization 3 to the control group.
  - 56 3.4. Assign organization 4 to the intervention group.
  - 57 ...
  - 58 3.77. Assign organization 77 to the control group.
  - 59 3.78. Assign organization 78 to the intervention group.
- 60 4. Assign organization 79 to the intervention or control group, considering the organization's characteristics and  
61 previous assignments of organizations (that is, the characteristics and assignment of organizations 1 to 78).
  - 62 4.1. Temporarily assign organization 79 to the intervention group and calculate an  $\chi^2$  test statistic for each  
63 of four organization characteristics—the anticipated number of Medicare FFS beneficiaries, the number  
64 of service sites, U.S. Department of Health and Human Services (HHS) region, and number of  
65 practitioners. For HHS region, the test statistic measures imbalance for the characteristics for the level  
66 of the categorical variable that the 79th organization belongs to. (For example, if organization 79 is in  
67 HHS Region 1, it tests for differences between the intervention and control organizations in the number  
68 of organizations in HHS Region 1.) For other variables, the test statistic measures imbalance in the total  
69 number of anticipated beneficiaries, service sites, and practitioners.
  - 70 4.2. Temporarily assign organization 79 to the control group and repeat.
  - 71 4.3. For each characteristic, identify the group assignment—to the intervention group or to control group—  
72 that would result in less imbalance for that characteristic, as measured by the  $\chi^2$  test statistics.
  - 73 4.4. Assign organization 79 to the intervention group if two, three, or four of the characteristics would show  
74 less imbalance if organization 79 was assigned to the intervention group. Otherwise, assign organization  
75 79 to the control group.
- 76 5. Repeat Step 4 sequentially for each of the remaining organizations (80 through 516).

77 Some organizations participating in the Million Hearts Model were large, with more than 20 practitioners and  
78 multiple sites. In those cases, CMS chose to randomly assign the whole organization—not individual sites within the  
79 organization—to the intervention versus control group out of concern of contaminating the control group.  
80 Specifically, CMS was concerned that, if a large organization made changes to its electronic health record or other  
81 shared resources and processes to allow some of its sites (those randomly assigned to the intervention group) to  
82 implement the model, those changes could then apply to all sites at the organization (including those randomly  
83 assigned to the control group). Therefore, the model could change care at the control group sites, potentially  
84 decreasing the model's apparent effect.

## 85 **eMethods 2. Identifying beneficiaries to include in the study population**

86 We used data from the Million Hearts Data Registry to identify model beneficiaries for this study. We began with all  
87 Medicare FFS beneficiaries entered into the model by the participating organizations (both intervention or control)  
88 during 2017 and 2018, the first two years of the model: 230,697 beneficiaries from 173 intervention organizations  
89 plus 157,360 beneficiaries from 172 control organizations. (See Figure 1 in the article.) *Entering the model* means  
90 the organization reported the beneficiary to the Million Hearts Data Registry and CMS validated the beneficiary's  
91 visit record. To enter a beneficiary into the model, an organization had to upload data on a model-qualifying visit for  
92 the beneficiary and the demographic and clinical data needed to determine the beneficiary's baseline CVD risk. To  
93 validate each beneficiary's model entry, CMS (through a contractor) used Medicare administrative data to confirm  
94 the beneficiary (1) did indeed have a visit with a practitioner from the organization near the time listed and (2) met  
95 model eligibility criteria. Medicare beneficiaries met *model eligibility criteria* if they were ages 40 to 79 at the time  
96 of the first model visit, had no evidence of a prior myocardial infarction or stroke or transient ischemic attack (TIA),  
97 had Medicare FFS as their primary payer, did not have end-stage renal disease (ESRD), and were not receiving  
98 hospice benefits.

99 For this study, we further limited the analytic population in four ways. First, we restricted the population to those  
100 who had complete and plausible clinical data needed to calculate a baseline CVD risk score (for example, dropping  
101 beneficiaries with a systolic blood pressure of 0). Second, we required beneficiaries be observable in Medicare Parts  
102 A and B claims. *Observable* beneficiaries were those enrolled in Medicare Parts A and B FFS with Medicare as the  
103 primary payer during the month of model entry. Third, we checked additional model eligibility criteria in Medicare  
104 administrative data, removing observable beneficiaries who were not ages 40 to 79 or had evidence of a prior  
105 myocardial infarction, prior stroke, prior TIA, ESRD, or receipt of hospice services. (CMS validated beneficiaries  
106 were observable and met the other eligibility criteria. However, we found a very small proportion of beneficiaries  
107 who did not, likely due to differences in when we and CMS pulled claims and Medicare enrollment data.) Finally,  
108 we limited the population to people with CVD risk scores at model entry indicating high or medium CVD risk.  
109 Beneficiaries with *high and medium CVD risk* were those who were predicted to have, on their dates of model entry,  
110 at least 15% or higher risk of a myocardial infarction or stroke in the next 10 years.

111 After applying these restrictions, the study's final analysis population included 218,864 beneficiaries: 130,578  
112 beneficiaries from 172 intervention organizations and 88,286 beneficiaries from 170 control organizations.

113 An advantage of using Medicare data and the National Death Index (NDI) to identify outcomes was that we could  
114 measure outcomes for all beneficiaries in our analytic population for at least one day after model entry, without loss  
115 to follow-up. Beneficiaries contributed to the analysis until censoring at either

- 116 1. the study end date (December 31, 2021),
- 117 2. death,
- 118 3. losing Medicare FFS as the primary payer (for analysis of all outcomes other than death or cause of death), or
- 119 4. having a CVD event (only for analysis of first-time CVD events).

### 120 **eMethods 3. Outcome definitions**

121 We estimated effects on 11 outcomes. All outcomes were prespecified in the trial protocol registered at  
122 [clinicaltrials.gov](https://clinicaltrials.gov), with two exceptions:

- 123 • We added the outcome of **first-time CVD events or CVD death** because of newly available data linkages  
124 between Medicare administrative records and cause-of-death data from the NDI, which we did not anticipate  
125 having when we drafted the trial protocol. This outcome is conceptually very similar to the primary outcome of  
126 first-time CVD events (measured in Medicare claims), but addresses an important limitation. Especially during  
127 the Covid-19 pandemic,<sup>1</sup> the claims-based outcome is likely to undercount the true number of CVD events  
128 because some events do not generate a Medicare claim—for example, because the beneficiary dies before  
129 reaching the hospital. This outcome is broader than myocardial infarctions and strokes, however, in that it  
130 includes all coronary heart disease (CHD) deaths (not just those due to myocardial infarctions).
- 131 • We changed the outcome for **office visits**. The trial protocol specified analyzing office visits with a *Million*  
132 *Hearts Model practitioner*. However, this was not practical to implement due to changes in the practitioner list  
133 after random assignment. As a result, we instead analyzed all office visits.

134 All outcomes were constructed at the beneficiary-quarter level, except the three event measures (first-time CVD  
135 events, first-time CVD events or CVD deaths, and all-cause deaths) and one episode-level measure (per beneficiary  
136 per month [PBPM] Medicare spending for first-time CVD events). For the beneficiary-quarter-level outcomes, we  
137 defined the quarterly observations relative to each beneficiary's model entry date. For example, Quarter 1 for a  
138 beneficiary who entered the model on March 7, 2017, spanned the period from March 7, 2017, through June 6, 2017,  
139 whereas Quarter 1 for a beneficiary who entered the model on July 24, 2017, spanned July 24, 2017, through  
140 October 23, 2017. We summed total Medicare spending and service use outcomes over each intervention quarter.  
141 We quarterized outcomes for beneficiaries who were not observable for the full quarter and constructed  
142 observability weights that reflected the amount of time the beneficiary was observable in the quarter. (For example,  
143 if a beneficiary had one outpatient emergency department (ED) visit in the quarter but was observed for only 60  
144 days of the quarter, that beneficiary's quarterized outpatient ED visit rate would be [1 visits / 60 days observed] \* 90  
145 days in the quarter = 1.5 visits per quarter.) Beneficiaries were observable if they were alive and enrolled in  
146 Medicare FFS Parts A and B with Medicare as their primary payer. Beneficiaries who were fully observable in any  
147 quarter received an observability weight of one for that quarter. Those who were observable for less than a quarter  
148 (for example, due to death or loss of Parts A and B coverage), received a weight that was the share of days in the  
149 quarter the person was actually observed.

150 Definitions of the outcomes follow.

#### 151 **1. Primary outcome: First-time CVD events, as measured in Medicare claims**

152 We measured myocardial infarctions, strokes, and TIAs using Medicare FFS inpatient hospital claims and outpatient  
153 ED or observation stay claims. In the inpatient claims, we identified these events if the principal or any of the  
154 secondary diagnoses had a relevant diagnosis, as long as the secondary diagnosis was not present on admission. The  
155 not-present-on-admission restriction sought to exclude events previously diagnosed or treated. In the outpatient ED  
156 and observation stay claims, we identified events based on the principal diagnosis only.

157 Definitions were based on the Chronic Conditions Data Warehouse (CCW) definitions.<sup>2</sup> For myocardial infarctions,  
158 the definition included diagnoses categorized as ST elevation (STEMI), non-ST elevation (NSTEMI), and  
159 unspecified myocardial infarction (this corresponds to Type 1 myocardial infarctions, as defined by the Fourth  
160 Universal Definition of Myocardial Infarction<sup>3</sup>). The measure also included all five types of myocardial infarctions  
161 in the Fourth Universal Definition of Myocardial Infarction. We excluded any diagnoses for complications  
162 following STEMI and NSTEMI, as well as diagnoses for subsequent myocardial infarction from the outcome  
163 definition because the outcome aims to measure first myocardial infarctions. For stroke and TIA, the diagnoses  
164 included those categorized as ischemic and hemorrhagic stroke, transient ischemic attack, and stroke syndromes.

165 Based on previous validation studies, Medicare claims data capture the primary outcome of this study—myocardial  
166 infarction, stroke, and TIA—with reasonable positive predictive values (80 percent or greater for myocardial  
167 infarction and stroke and 70 percent or greater for TIAs).<sup>4,5,6</sup> However, sensitivity estimates were lower, especially

168 for fatal events (Xie et al. 2018),<sup>7</sup> which likely reflects a substantial portion of beneficiaries who die from these  
 169 events outside of the hospital without generating a Medicare claim.

170 **List of ICD-10 codes used to define myocardial infarction, stroke, and TIA in claims data**

**Definition**  
**Diagnosis codes**

|                             |                                                                                                                                                                                                                                                                                                                                                                                                                                                                                                                                                                                                                                                                                                                                                                                                                                                                                                                                                                                                                                                                                                                                                                                                                                                                                                                                                                                                                                                                                                     |
|-----------------------------|-----------------------------------------------------------------------------------------------------------------------------------------------------------------------------------------------------------------------------------------------------------------------------------------------------------------------------------------------------------------------------------------------------------------------------------------------------------------------------------------------------------------------------------------------------------------------------------------------------------------------------------------------------------------------------------------------------------------------------------------------------------------------------------------------------------------------------------------------------------------------------------------------------------------------------------------------------------------------------------------------------------------------------------------------------------------------------------------------------------------------------------------------------------------------------------------------------------------------------------------------------------------------------------------------------------------------------------------------------------------------------------------------------------------------------------------------------------------------------------------------------|
| Myocardial infarction       | STEMI: I21.01, I21.02, I21.09, I21.11, I21.19, I21.21, I21.29, I21.3<br>NSTEMI: I21.4<br>Unspecified: I21.9<br>Type 2: I21.A1<br>Other types: I21.A9                                                                                                                                                                                                                                                                                                                                                                                                                                                                                                                                                                                                                                                                                                                                                                                                                                                                                                                                                                                                                                                                                                                                                                                                                                                                                                                                                |
| Stroke and TIA <sup>a</sup> | Ischemic and hemorrhagic stroke, original codes: I60.00, I60.01, I60.02, I60.10, I60.11, I60.12, I60.2, I60.20, I60.21, I60.22, I60.30, I60.31, I60.32, I60.4, I60.50, I60.51, I60.52, I60.6, I60.7, I60.8, I60.9, I61.0, I61.1, I61.2, I61.3, I61.4, I61.5, I61.6, I61.8, I61.9, I63.00, I63.011, I63.012, I63.013, I63.019, I63.02, I63.031, I63.032, I63.033, I63.039, I63.09, I63.10, I63.111, I63.112, I63.113, I63.119, I63.12, I63.131, I63.132, I63.133, I63.139, I63.19, I63.20, I63.211, I63.212, I63.213, I63.219, I63.22, I63.231, I63.232, I63.233, I63.239, I63.29, I63.30, I63.311, I63.312, I63.313, I63.319, I63.321, I63.322, I63.323, I63.329, I63.331, I63.332, I63.333, I63.339, I63.341, I63.342, I63.343, I63.349, I63.39, I63.40, I63.411, I63.412, I63.413, I63.419, I63.421, I63.422, I63.423, I63.429, I63.431, I63.432, I63.433, I63.439, I63.441, I63.442, I63.443, I63.449, I63.49, I63.50, I63.511, I63.512, I63.513, I63.519, I63.521, I63.522, I63.523, I63.529, I63.531, I63.532, I63.533, I63.539, I63.541, I63.542, I63.543, I63.549, I63.59, I63.6, I63.81, I63.89, I63.9. I62.00, I62.01, I62.02, I62.9<br>TIA: G45.0, G45.1, G45.2, G45.8, G45.9, I67.81, I67.82, I67.841, I67.848, I67.89<br>Other stroke syndromes: G46.0, G46.1, G46.2, G46.3, G46.4, G46.5, G46.6, G46.7, G46.8, G97.31, G97.32, I66.01, I66.02, I66.03, I66.09, I66.11, I66.12, I66.13, I66.19, I66.21, I66.22, I66.23, I66.29, I66.3, I66.8, I66.9, I97.810, I97.811, I97.820, I97.821 |

**Diagnosis fields**

|                                           |                                                                                      |
|-------------------------------------------|--------------------------------------------------------------------------------------|
| Inpatient claims                          | Principal and secondary, but only those secondary diagnoses not present on admission |
| Outpatient ED and observation stay claims | Principal only                                                                       |

171 <sup>a</sup> For stroke, we applied the CCW stroke exclusions as originally defined in its 2018 specifications and added new exclusion codes  
 172 from the 2022 updates. The stroke exclusion codes, including the original 2018 codes, are S01.90XA, S02.0XXA, S02.0XXB,  
 173 S02.10XA, S02.10XB, S02.101A, S02.101B, S02.102A, S02.102B, S02.109A, S02.109B, S02.11GA, S02.11GB, S02.11HA,  
 174 S02.11HB, S02.110A, S02.111A, S02.112A, S02.113A, S02.110B, S02.111B, S02.112B, S02.113B, S02.118A, S02.118B,  
 175 S02.119A, S02.119B, S02.19XA, S02.19XB, S02.2XXA, S02.2XXB, S02.3XXA, S02.30XA, S02.3XXB, S02.30XB, S02.31XA,  
 176 S02.31XB, S02.32XA, S02.32XB, S02.40AA, S02.40AB, S02.40BA, S02.40BB, S02.40CA, S02.40CB, S02.40DA, S02.40DB,  
 177 S02.40EA, S02.40EB, S02.40FA, S02.40FB, S02.400A, S02.400B, S02.401A, S02.401B, S02.402A, S02.402B, S02.411A,  
 178 S02.411B, S02.412A, S02.412B, S02.413A, S02.413B, S02.42XA, S02.42XB, S02.600A, S02.600B, S02.601A, S02.601B,  
 179 S02.602A, S02.602B, S02.609A, S02.609B, S02.61XA, S02.610A, S02.610B, S02.611A, S02.611B, S02.612A, S02.612B,  
 180 S02.62XA, S02.620A, S02.620B, S02.621A, S02.621B, S02.622A, S02.622B, S02.63XA, S02.630A, S02.63XB,  
 181 S02.630B, S02.631A, S02.631B, S02.632A, S02.632B, S02.64XA, S02.640A, S02.64XB, S02.640B, S02.641A, S02.641B,  
 182 S02.642A, S02.642B, S02.65XA, S02.650A, S02.65XB, S02.650B, S02.651A, S02.651B, S02.652A, S02.652B, S02.66XA,  
 183 S02.66XB, S02.67XA, S02.670A, S02.670B, S02.671A, S02.671B, S02.672A, S02.672B, S02.69XA, S02.61XB, S02.62XA,  
 184 S02.63XA, S02.64XA, S02.65XA, S02.66XA, S02.67XB, S02.69XB, S02.8XXA, S02.80XA, S02.8XXB, S02.80XB, S02.81XA,  
 185 S02.81XB, S02.82XA, S02.82XB, S02.91XA, S02.91XB, S02.92XA, S02.92XB, S06.0X0A, S06.0X1A, S06.0X2A, S06.0X3A,  
 186 S06.0X4A, S06.0X5A, S06.0X6A, S06.0X7A, S06.0X8A, S06.0X9A, S06.1X0A, S06.1X1A, S06.1X2A, S06.1X3A, S06.1X4A,  
 187 S06.1X5A, S06.1X6A, S06.1X7A, S06.1X8A, S06.1X9A, S06.2X0A, S06.2X1A, S06.2X2A, S06.2X3A, S06.2X4A, S06.2X5A,

188 S06.2X6A, S06.2X7A, S06.2X8A, S06.2X9A, S06.2X0B, S06.2X1B, S06.2X2B, S06.2X3B, S06.2X4B, S06.2X5B, S06.2X6B,  
 189 S06.2X7B, S06.2X8B, S06.2X9B, S06.300A, S06.301A, S06.302A, S06.303A, S06.304A, S06.305A, S06.306A, S06.307A,  
 190 S06.308A, S06.309A, S06.310A, S06.311A, S06.312A, S06.313A, S06.314A, S06.315A, S06.316A, S06.317A, S06.318A,  
 191 S06.319A, S06.320A, S06.321A, S06.322A, S06.323A, S06.324A, S06.325A, S06.326A, S06.327A, S06.328A, S06.329A,  
 192 S06.330A, S06.331A, S06.332A, S06.333A, S06.334A, S06.335A, S06.336A, S06.337A, S06.338A, S06.339A, S06.340A,  
 193 S06.341A, S06.342A, S06.343A, S06.344A, S06.345A, S06.346A, S06.347A, S06.348A, S06.349A, S06.350A, S06.351A,  
 194 S06.352A, S06.353A, S06.354A, S06.355A, S06.356A, S06.357A, S06.358A, S06.359A, S06.360A, S06.361A, S06.362A,  
 195 S06.363A, S06.364A, S06.365A, S06.366A, S06.367A, S06.368A, S06.369A, S06.370A, S06.371A, S06.372A, S06.373A,  
 196 S06.374A, S06.375A, S06.376A, S06.377A, S06.378A, S06.379A, S06.380A, S06.381A, S06.382A, S06.383A, S06.384A,  
 197 S06.385A, S06.386A, S06.387A, S06.388A, S06.389A, S06.4X0A, S06.4X1A, S06.4X2A, S06.4X3A, S06.4X4A, S06.4X5A,  
 198 S06.4X6A, S06.4X7A, S06.4X8A, S06.4X9A, S06.5X0A, S06.5X1A, S06.5X2A, S06.5X3A, S06.5X4A, S06.5X5A, S06.5X6A,  
 199 S06.5X7A, S06.5X8A, S06.5X9A, S06.6X0A, S06.6X1A, S06.6X2A, S06.6X3A, S06.6X4A, S06.6X5A, S06.6X6A, S06.6X7A,  
 200 S06.6X8A, S06.6X9A, S06.810A, S06.811A, S06.812A, S06.813A, S06.814A, S06.815A, S06.816A, S06.817A, S06.818A,  
 201 S06.819A, S06.820A, S06.821A, S06.822A, S06.823A, S06.824A, S06.825A, S06.826A, S06.827A, S06.828A, S06.829A,  
 202 S06.890A, S06.891A, S06.892A, S06.893A, S06.894A, S06.895A, S06.896A, S06.897A, S06.898A, S06.899A, S06.9X0A,  
 203 S06.9X1A, S06.9X2A, S06.9X3A, S06.9X4A, S06.9X5A, S06.9X6A, S06.9X7A, S06.9X8A, S06.9X9A, OR Z51.89 as the principal  
 204 diagnosis code. Exclusion codes newly included 2022 are S02.121A, S02.121B, S02.122A, S02.122B, S02.129A, S02.129B,  
 205 S02.831A, S02.831B, S02.832A, S02.832B, S02.839A, S02.839B, S02.841A, S02.841B, S02.842A, S02.842B, S02.849A,  
 206 S02.849B, S02.85XA, and S02.85XB.

207 Abbreviations: ED = emergency department; CCW = Chronic Conditions Data Warehouse; ICD-10 = *International Classification of*  
 208 *Diseases*, 10th edition; NSTEMI = non-ST elevation; STEMI = ST elevation; TIA = transient ischemic attack.

209 **2. First-time CVD events or CVD deaths**

210 This outcome includes first-time CVD events measured in claims, as described previously, and adds deaths due to  
 211 CHD or cerebrovascular disease without a Medicare claim.

212 For this outcome and the breakdown of deaths by cause, we identified cause-specific mortality based on the  
 213 underlying cause of death codes obtained from the NDI. The World Health Organization defines the underlying  
 214 cause of death as “the disease or injury which initiated the train of morbid events leading directly to death, or the  
 215 circumstances of the accident or violence which produced the fatal injury.” We classified underlying causes of death  
 216 into circulatory system-related deaths, and further classified circulatory system-related deaths as CHD or  
 217 cerebrovascular disease-related deaths using the same *International Classification of Diseases*, 10th edition (ICD-  
 218 10) diagnosis-based definitions used by the American Heart Association and the Reasons for Geographic and Racial  
 219 Differences in Stroke (REGARDS) project.<sup>8,9</sup>

220 **NDI-based definitions of CHD, cerebrovascular disease, and circulatory-system-related conditions**  
 221 **(ICD-10 codes only)**

| Cause of death                        | ICD-10 diagnosis codes                                |
|---------------------------------------|-------------------------------------------------------|
| All circulatory system-related deaths | I00–I99                                               |
| CHD or cerebrovascular deaths         | CHD: I20–I25, I46, I49<br>Cerebrovascular: I60 to I69 |
| All other deaths                      | All other ICD-10 codes                                |

222 Abbreviations: CHD = coronary heart disease; ICD-10 = *International Classification of Diseases*, 10th edition; NDI = National Death  
 223 Index.

224 According to REGARDS, NDI-derived cause-specific mortality based on these definitions had good specificity and  
 225 modest sensitivity (specificity of 85 percent for all circulatory-system conditions, 90 percent for CHD, and 99  
 226 percent for cerebrovascular deaths; sensitivity: 73 percent for all circulatory system-related conditions, 54 percent  
 227 for CHD, and 52 percent for cerebrovascular deaths).<sup>8,9</sup> The top ICD-10 diagnosis codes in each cause-of-death  
 228 category were as follows.

229

230 **Top ICD-10 diagnosis codes, by cause-of-death category**

| Cause of death                          | Top 5 ICD-10 diagnosis codes                                                                                                                                                                                                                                              |
|-----------------------------------------|---------------------------------------------------------------------------------------------------------------------------------------------------------------------------------------------------------------------------------------------------------------------------|
| CHD deaths                              | I25.1, Atherosclerotic heart disease of native coronary artery<br>I21.9, Acute myocardial infarction, unspecified<br>I25.0, Atherosclerotic cardiovascular disease, so described<br>I46.9, Cardiac arrest, cause unspecified<br>I25.5, Ischemic cardiomyopathy            |
| Cerebrovascular deaths                  | I64, Stroke, not specified as hemorrhage or infarction<br>I61.9, Nontraumatic intracerebral hemorrhage, unspecified<br>I63.9, Cerebral infarction, unspecified<br>I62.9, Nontraumatic intracranial hemorrhage, unspecified<br>I67.9, Cerebrovascular disease, unspecified |
| Other circulatory-system-related deaths | I50.0, Congestive heart failure<br>I11.9, Hypertensive heart disease without heart failure<br>I48, Atrial fibrillation and flutter<br>I42.9, Cardiomyopathy, unspecified<br>I50.9, Heart failure, unspecified                                                             |

231 Abbreviations: CHD = coronary heart disease; ICD-10 = *International Classification of Diseases*, 10th edition.

232 We extracted the date of death from the Medicare Enrollment Database (EDB). Among 26,403 beneficiaries who  
233 died by the end of 2021 based on EDB, 98.7 percent had a corresponding NDI record. For deceased beneficiaries  
234 without a corresponding NDI record, we coded their cause of death as unknown.

235 **3. Primary outcome: PBPM Medicare spending on first-time CVD events**

236 We constructed a measure of spending (before model payments) for first-time CVD events, including spending  
237 during the acute event and 90 days following the event. This measure included all Medicare FFS payments made to  
238 hospitals for the acute event (an inpatient stay, an outpatient ED visit, or observation stay) as well as all payments  
239 made to individual practitioners for care provided during the acute event. Further, this measure included all  
240 Medicare payments in the 90 days after discharge for all services delivered during this window, even if they were  
241 unrelated to the acute event. We chose a 90-day window, following other studies,<sup>10,11,12</sup> to capture relevant services  
242 such as rehabilitation that often last several months after an event. This outcome included Medicare payments for  
243 services found in each of the FFS claims files: inpatient, skilled nursing facility, hospice, home health, outpatient,  
244 carrier (also called Part B), and durable medical equipment. If a claim was partially contained within the 90-day  
245 window—for example, an inpatient hospital claim spanning days 86 to 95 post-discharge—we calculated the  
246 average daily payment for the claim and estimated Medicare payments contained within the 90-day episode window  
247 by multiplying the average daily payment rate by the number of days that fell in the 90-day window. We did not  
248 measure 90-day episode spending for acute events if (1) the beneficiary was not observable for the full 90-day  
249 window for any reason other than death (for example, if they moved into Medicare Advantage during the 90-day  
250 window [n = 217 events excluded]); or (2) if the acute event occurred too late in the analysis period to measure 90-  
251 day spending (for example, an event for which the 90-day window ended on or after January 1, 2022 [n = 6 events  
252 excluded]). The n = 223 excluded events represented 3 percent of the acute events otherwise eligible for the event  
253 spending analyses.

254 **4. PBPM Medicare Parts A and B spending, before model payments**

255 We calculated Medicare spending for claims for inpatient, carrier (Part B), outpatient, home health services, skilled  
256 nursing facility, hospice services, and durable medical equipment. We summed payments across all claims with a  
257 from or admission date in each relevant quarter to create the measure of total Parts A and B Medicare spending. This  
258 measure does not include Part D spending.



259 **5. PBPM Medicare Parts A and B spending, including model payments**

260 We added estimated PBPM model payments to the measure of Medicare Parts A and B spending, described  
261 previously.

262 Total Million Hearts Model payments for the intervention group beneficiaries were an estimated \$7.2 million. This  
263 figure included (1) all payments for risk assessment in 2017 and 2018, given that organizations needed to the  
264 perform risk assessments (for beneficiaries in all risk groups) to identify the high- and medium-risk beneficiaries  
265 included in the study population; (2) all cardiovascular management payments, which were paid in 2017 only for  
266 high-risk beneficiaries; and (3) risk reduction payments in 2018–2021 which we estimated were for high-risk  
267 beneficiaries entering the model in 2017–2018. We divided this \$7.2 million total by the number of beneficiary-  
268 months among the high- and medium-risk beneficiaries who entered the model through December 2018. Note this  
269 outcome does not include costs of implementing the model, such as maintaining the Million Hearts Data Registry or  
270 calculating semiannual performance (for risk reduction payments).

271 **6. All-cause hospitalizations**

272 We counted the number of acute inpatient admissions using the inpatient claims.

273 **7. All-cause ED visits**

274 We counted the number of outpatient ED visits or observation stays that did not end in admission using outpatient  
275 claims file. We identified ED visits using revenue center codes (0450, 0451, 0452, 0456, 0459, and 0981). We  
276 identified observation stays using revenue center codes (0760 or 0762), combined with Healthcare Common  
277 Procedure Coding System (HCPCS) code G0378 and a unit count of eight or more. We only allowed for one ED  
278 visit or observation stay per day so as not to count multiple claims from the stay as multiple visits.

279 **8. and 9. Circulatory system-related hospitalizations or ED visits**

280 To measure hospitalizations or outpatient ED visits (including observation stays) for circulatory system-related  
281 conditions, we developed a list of more than 300 ICD-10 relevant diagnosis codes, including those related to heart  
282 failure, hypertension, and angina, as well as the diagnoses for myocardial infarction, stroke, or TIA listed in in the  
283 description of the measure of first-time CVD events.<sup>1</sup> We then added diagnoses for subsequent myocardial infarction  
284 (I220, I221, I222, I228, and I229, all included in the CCW definition of myocardial infarction) to the definition of  
285 circulatory system-related conditions because we did not include these diagnoses in our definition of *first-time* CVD  
286 events, described previously.

---

<sup>1</sup> Of the ICD-10 diagnoses included in our list, the following appeared most frequently on inpatient or outpatient claims during the baseline period in our study population: A5201, B3322, C380, D151, G454, G9340, G9341, G9349, G9389, G939, G968, G969, G980, G988, I011, I018, I019, I050, I051, I052, I058, I059, I060, I061, I062, I068, I069, I071, I078, I079, I080, I081, I082, I083, I088, I089, I0981, I0989, I099, I10, I110, I119, I130, I1310, I132, I150, I151, I152, I158, I159, I160, I161, I169, I200, I201, I208, I209, I236, I240, I241, I248, I249, I2510, I25110, I25111, I25118, I25119, I252, I253, I2541, I255, I256, I25700, I25701, I25708, I25709, I25710, I25718, I25719, I25720, I25721, I25728, I25729, I25739, I25750, I25758, I25759, I25790, I25791, I25798, I25799, I25810, I25811, I25812, I2582, I2583, I2584, I2589, I259, I270, I271, I2720, I2721, I2781, I2789, I279, I281, I288, I289, I300, I301, I308, I309, I311, I312, I313, I314, I318, I319, I32, I330, I339, I340, I341, I342, I348, I349, I350, I351, I352, I358, I359, I360, I361, I362, I368, I369, I370, I371, I372, I379, I38, I39, I400, I401, I41, I420, I421, I422, I423, I425, I426, I427, I428, I429, I43, I440, I441, I442, I4430, I4439, I444, I447, I450, I4510, I4519, I452, I453, I454, I455, I456, I4581, I4589, I459, I462, I468, I469, I470, I471, I472, I479, I480, I481, I482, I483, I484, I4891, I4892, I4901, I4902, I491, I492, I493, I4940, I4901, I4902, I491, I493, I4949, I495, I498, I499, I501, I5020, I5021, I5022, I5023, I5030, I5031, I5032, I5033, I5040, I5041, I5042, I5043, I50810, I509, I510, I511, I513, I514, I515, I517, I5181, I5189, I519, I52, I6200, I6201, I6202, I6203, I621, I629, I6501, I6502, I6503, I6509, I651, I6521, I6522, I6523, I6529, I658, I659, I672, I6781, I6782, I6783, I679, I680, and I700.29.

287 **10. Office visits**

288 To identify outpatient office visits, we flagged all claims in the carrier file with both (1) a specialty code indicating a  
289 claim from a physician, physician assistant, nurse practitioner, or certified clinical nurse specialist; and (2) a Current  
290 Procedural Terminology (CPT<sup>®</sup>) or HCPCs code for evaluation and management services that indicated the claim  
291 was for an outpatient office<sup>ii</sup> or telehealth<sup>iii</sup> visit. We further used the outpatient file to identify all outpatient visits to  
292 federally qualified health centers, rural health clinics, and critical access hospitals. To avoid double-counting visits  
293 across outpatient and carrier claims—for example, for beneficiaries with an office visit at a critical access hospital  
294 outpatient facility and for whom we would observe both an outpatient and carrier claim—we counted only one visit  
295 per beneficiary per day.

296 **11. All-cause deaths**

297 We measured death based on date of death in the Medicare EDB.

298

---

<sup>ii</sup> Outpatient office or clinic codes include 99201, 99202, 99203, 99204, 99205, 99211, 99212, 99213, 99214, 99215, 99487, 99489, 99495, 99496, 99304, 99305, 99306, 99307, 99308, 99309, 99310, 99315, 99316, 99324, 99325, 99326, 99327, 99328, 99334, 99335, 99336, 99337, 99339, 99340, 99341, 99342, 99343, 99344, 99345, 99347, 99348, 99349, 99350, 99318, 99490, 99497, G0402, G0438, G0439, G0181, 99492, 99493, 99494, 99484, G0502, G0503, G0504, G0507, 99354, 99355, 99358, 99359, 99406, 99407, 97802, 97803, 96152, 96153, 96154, 96160, G0101, G0102, G0108, G0109, G0270, G0271, G0442, G0443, G0444, G0445, G0446, G0447, 99401, 99402, 99403, 99404, 99408, 99409, 99411, 99412, 99420, 99429, 99381, 99382, 99383, 99384, 99385, 99386, 99387, 99391, 99392, 99393, 99394, 99395, 99396, 99397, G0473, G0466, G0467, G0468, G0469, G0470, G2064, G2065, G0076, G0077, G0078, G0079, G0080, G0081, G0082, G0083, G0084, G0085, G0086, G0087, G2011, G2076, G2212, G2214, G9987, G0296, G0396, G0397, Q0091, G0511, G0512, G0463, 99488, G0505, G0506, and 99483.

<sup>iii</sup> Telehealth-specific codes include 98966, 98967, 98968, 99441, 99442, 99443, 98969, 99444, 98970, 98971, 98972, 99421, 99422, 99423, 99453, 99454, 99457, 99474, G2010, G2012, G2061, G2062, G2063, G2250, G2251, G2252, G9978, G9979, G9980, G9981, G9982, G9983, G9984, G9985, G9986, and G0071.

299 **eMethods 4. Additional restrictions when identifying the population used to analyze**  
300 **Medicare spending for first-time CVD events**

301 For the analyses of one outcome measure—Medicare spending on first-time CVD events—we restricted the main  
302 analysis population (defined in eMethods 2) to beneficiaries entering the Million Hearts Model on or before August  
303 31, 2017. Among these beneficiaries, we could measure spending during a triggering CVD event (of up to one  
304 month) with 90 days of follow-up for all CVD events happening within four years of model entry. (Among the first-  
305 time CVD events included in this analysis, more than 95 percent had a hospital stay shorter than one month.) After  
306 applying this restriction, the analysis population comprised 92,104 high- and medium-risk beneficiaries from 170  
307 intervention organizations and 56,023 beneficiaries from 160 control organizations. This represented 71 percent of  
308 the intervention beneficiaries and 63 percent of control beneficiaries included in analysis of CVD events and other  
309 long-term outcomes.

310 **eMethods 5. Covariates included in regression models**

311 To improve precision of the effect estimates and to account for any observed differences between the intervention  
 312 and control beneficiaries, we adjusted for a wide range of beneficiary-, organization-, and region-level variables:

| Covariate, measured at date of model entry or attribution                                                                                           | Included in regression models with the population of: |                          |
|-----------------------------------------------------------------------------------------------------------------------------------------------------|-------------------------------------------------------|--------------------------|
|                                                                                                                                                     | Model beneficiaries                                   | Attributed beneficiaries |
| <b>Clinical indicators of beneficiary’s cardiovascular risk</b>                                                                                     |                                                       |                          |
| CVD risk score <sup>a, b, c</sup>                                                                                                                   | ■                                                     |                          |
| Predicted CVD risk score (see eMethods 6)                                                                                                           |                                                       | ■                        |
| Predicted probabilities of belonging to the high- or medium-, high-, medium-, and low-CVD risk groups (four variables; see eMethods 6) <sup>c</sup> |                                                       | ■                        |
| Estimated modifiable risk <sup>a, b, c, d, e</sup>                                                                                                  | ■                                                     |                          |
| Claims-based CVD risk score (assuming optimal values for clinical values)                                                                           |                                                       | ■                        |
| Evidence of diabetes in claims (yes/no)                                                                                                             | ■                                                     | ■                        |
| Systolic blood pressure (mm Hg) <sup>a</sup>                                                                                                        | ■                                                     |                          |
| Evidence of hypertension in claims over previous 24 months (yes/no)                                                                                 | ■                                                     | ■                        |
| Total cholesterol (mg/dL) <sup>a</sup>                                                                                                              | ■                                                     |                          |
| HDL cholesterol (mg/dL) <sup>a</sup>                                                                                                                | ■                                                     |                          |
| LDL cholesterol (mg/dL) <sup>a, e</sup>                                                                                                             | ■                                                     |                          |
| Evidence of hyperlipidemia in claims over previous 12 months (yes/no)                                                                               | ■                                                     | ■                        |
| Is current smoker (yes/no) <sup>a</sup>                                                                                                             | ■                                                     |                          |
| Evidence of tobacco use in claims over previous 24 months (yes/no)                                                                                  |                                                       | ■                        |
| <b>Beneficiary’s medication use in the year before model entry<sup>f</sup></b>                                                                      |                                                       |                          |
| Uses antihypertensive medications (yes/no/without Part D enrollment)                                                                                | ■                                                     | ■                        |
| Uses statins (no/low/moderate/high/without Part D enrollment)                                                                                       | ■                                                     | ■                        |
| Uses aspirin (yes/no) <sup>a</sup>                                                                                                                  | ■                                                     |                          |
| Evidence of aspirin use in claims over previous 24 months (yes/no)                                                                                  |                                                       | ■                        |
| <b>Beneficiary’s demographic and Medicare enrollment characteristics</b>                                                                            |                                                       |                          |
| Age (separately by categorical age group) <sup>b</sup>                                                                                              | ■                                                     | ■                        |
| Race and ethnicity predicted probabilities: non-Hispanic Black, non-Hispanic White, Hispanic (3 variables) <sup>g</sup>                             | ■                                                     | ■                        |
| Male (yes/no)                                                                                                                                       | ■                                                     | ■                        |
| Dually enrolled in Medicare and Medicaid (yes/no)                                                                                                   | ■                                                     | ■                        |
| Originally entitled to Medicare due to disability (yes/no)                                                                                          | ■                                                     | ■                        |
| Received Part D low-income subsidy for at least one month over previous year                                                                        | ■                                                     | ■                        |
| <b>Beneficiary’s health and comorbid conditions from claims</b>                                                                                     |                                                       |                          |
| HCC score <sup>b</sup>                                                                                                                              | ■                                                     | ■                        |
| Count of chronic conditions                                                                                                                         | ■                                                     | ■                        |
| Has chronic kidney disease (yes/no)                                                                                                                 | ■                                                     | ■                        |
| Has ischemic heart disease (yes/no)                                                                                                                 | ■                                                     | ■                        |

| Covariate, measured at date of model entry or attribution                                               | Included in regression models with the population of: |                          |
|---------------------------------------------------------------------------------------------------------|-------------------------------------------------------|--------------------------|
|                                                                                                         | Model beneficiaries                                   | Attributed beneficiaries |
| Has heart failure (yes/no)                                                                              | ■                                                     | ■                        |
| Has atrial fibrillation (yes/no)                                                                        | ■                                                     | ■                        |
| Has morbid obesity (yes/no)                                                                             | ■                                                     | ■                        |
| Has dementia (yes/no)                                                                                   | ■                                                     | ■                        |
| Has diabetes with complications (yes/no)                                                                | ■                                                     | ■                        |
| Has dialysis status, acute renal failure, or stage 5 chronic kidney disease (yes/no)                    | ■                                                     | ■                        |
| Has cancer (yes/no)                                                                                     | ■                                                     | ■                        |
| Has unstable angina (yes/no)                                                                            | ■                                                     | ■                        |
| Has chronic obstructive pulmonary disease (yes/no)                                                      | ■                                                     | ■                        |
| Has vascular disease with complications (yes/no)                                                        | ■                                                     | ■                        |
| Has drug or alcohol dependence (yes/no)                                                                 | ■                                                     | ■                        |
| Has heart failure <i>and</i> diabetes (yes/no)                                                          | ■                                                     | ■                        |
| Has heart failure <i>and</i> chronic kidney disease (yes/no)                                            | ■                                                     | ■                        |
| Has heart failure <i>and</i> atrial fibrillation (yes/no)                                               | ■                                                     | ■                        |
| Has heart failure <i>and</i> ischemic heart disease (yes/no)                                            | ■                                                     | ■                        |
| Has ischemic heart disease <i>and</i> chronic kidney disease (yes/no)                                   | ■                                                     | ■                        |
| Has ischemic heart disease <i>and</i> diabetes (yes/no)                                                 | ■                                                     | ■                        |
| Has ischemic heart disease <i>and</i> chronic obstructive pulmonary disease (yes/no)                    | ■                                                     | ■                        |
| <b>Beneficiary's medical service use and spending in year before model entry<sup>f</sup></b>            |                                                       |                          |
| Total Medicare Parts A and B annualized expenditures <sup>b, h</sup>                                    | ■                                                     | ■                        |
| Total inpatient annualized expenditures <sup>h</sup>                                                    | ■                                                     | ■                        |
| Number of hospital admissions <sup>h</sup>                                                              | ■                                                     | ■                        |
| Number of circulatory system-related hospital admissions <sup>h</sup>                                   | ■                                                     | ■                        |
| Number of outpatient ED visits or observation stays <sup>h</sup>                                        | ■                                                     | ■                        |
| Number of circulatory system-related ED visits or observation stays <sup>h</sup>                        | ■                                                     | ■                        |
| Number of office visits <sup>h</sup>                                                                    | ■                                                     | ■                        |
| Number of office visits with model-aligned practitioners <sup>h</sup>                                   | ■                                                     | ■                        |
| Number of cardiologist office visits <sup>h</sup>                                                       | ■                                                     | ■                        |
| <b>Beneficiary's CVD-related procedures in year before model entry<sup>f</sup></b>                      |                                                       |                          |
| Received echocardiogram (yes/no)                                                                        | ■                                                     | ■                        |
| Received electrocardiogram (yes/no)                                                                     | ■                                                     | ■                        |
| Received cardiac stress test (yes/no)                                                                   | ■                                                     | ■                        |
| <b>Beneficiary's other preventive-care procedures in year before model entry<sup>f</sup></b>            |                                                       |                          |
| Received prophylactic vaccination or inoculation (yes/no)                                               | ■                                                     | ■                        |
| Received colonoscopy or biopsy (yes/no)                                                                 | ■                                                     | ■                        |
| <b>Characteristics of organization entering the beneficiary in the Million Hearts Model<sup>i</sup></b> |                                                       |                          |
| Total number of practitioners (1 to 5, 6 to 19, or 20 or more) <sup>d</sup>                             | ■                                                     | ■                        |
| Total number of service sites (1, 2 to 5, or 6 or more)                                                 | ■                                                     | ■                        |

| Covariate, measured at date of model entry or attribution                                                                                                                                                                                                                                                 | Included in regression models with the population of: |                          |
|-----------------------------------------------------------------------------------------------------------------------------------------------------------------------------------------------------------------------------------------------------------------------------------------------------------|-------------------------------------------------------|--------------------------|
|                                                                                                                                                                                                                                                                                                           | Model beneficiaries                                   | Attributed beneficiaries |
| Organization type (primary care, specialty or multispecialty, FQHC, RHC, or other health center; CAH, rural hospital, acute care hospital, or other)                                                                                                                                                      | ■                                                     | ■                        |
| Organization participated in or had application pending for another CMS model at random assignment (yes/no)                                                                                                                                                                                               | ■                                                     | ■                        |
| Organizational-level mean Parts A and B Medicare spending <sup>h,j</sup>                                                                                                                                                                                                                                  | ■                                                     | ■                        |
| Organizational-level mean hospital admissions (per 1,000 beneficiaries) <sup>h,j</sup>                                                                                                                                                                                                                    | ■                                                     | ■                        |
| Organizational-level mean outpatient ED visits or observation stays (per 1,000 beneficiaries) <sup>h,j</sup>                                                                                                                                                                                              | ■                                                     | ■                        |
| <b>Characteristics of practitioner entering the beneficiary in the Million Hearts Model<sup>i</sup></b>                                                                                                                                                                                                   |                                                       |                          |
| Practitioner specialty (cardiovascular-related physician/primary care physician [noncardiovascular]/other physician/other practitioner type [nonphysician])                                                                                                                                               | ■                                                     | ■                        |
| <b>Characteristics of beneficiary's region</b>                                                                                                                                                                                                                                                            |                                                       |                          |
| Rural (yes/no)                                                                                                                                                                                                                                                                                            | ■                                                     | ■                        |
| HHS Region (1: CT, ME, MA, NH, RI, and VT, 2: NY, NJ, PR, and VI, 3: DC, DE, MD, PA, VA, and WV, 4: AL, FL, GA, KY, MS, NC, SC, and TN, 5: IL, IN, MI, MN, OH, and WI, 6: AR, LA, NM, OK, and TX, 7: IA, KS, MO, and NE, 8: CO, MT, ND, SD, UT, and WY, 9: AZ, CA, HI, and NV, or 10: AK, ID, OR, and WA) | ■                                                     | ■                        |
| SVI (low vulnerability [summary SVI score deciles 1–4 or SVI unknown], medium vulnerability [summary SVI score deciles 5–8], or high vulnerability [summary SVI score deciles 9 and 10])                                                                                                                  | ■                                                     | ■                        |
| County-level AMI hospitalizations per 1,000 Medicare beneficiaries ages 65 and older in 2014–2016 <sup>h</sup>                                                                                                                                                                                            | ■                                                     | ■                        |
| County-level stroke hospitalizations per 1,000 Medicare beneficiaries ages 65 and older in 2014–2016 <sup>h</sup>                                                                                                                                                                                         | ■                                                     | ■                        |
| County-level age-adjusted mortality per 100,000 for residents ages 65 and older in 2014–2016 <sup>h</sup>                                                                                                                                                                                                 | ■                                                     | ■                        |
| County-level per capital total Medicare Parts A and B spending in 2016 <sup>h</sup>                                                                                                                                                                                                                       | ■                                                     | ■                        |
| County-level hospital admissions per 1,000 Medicare FFS beneficiaries in 2016 <sup>h</sup>                                                                                                                                                                                                                | ■                                                     | ■                        |
| County-level outpatient ED visits per 1,000 Medicare FFS beneficiaries in 2016 <sup>h</sup>                                                                                                                                                                                                               | ■                                                     | ■                        |
| <b>Characteristics of beneficiary's Million Hearts Model entry<sup>f</sup></b>                                                                                                                                                                                                                            |                                                       |                          |
| Calendar month of the model entry/attribution date (24 variables, each corresponding to 1 of the 24 months in 2017 and 2018)                                                                                                                                                                              | ■                                                     | ■                        |
| Fewer than 12 months observable in Medicare claims in the year before model entry/attribution (yes/no)                                                                                                                                                                                                    | ■                                                     | ■                        |
| Data submitted to the Million Hearts Data Registry using bulk upload options (yes/no) <sup>a, e</sup>                                                                                                                                                                                                     | ■                                                     | ■                        |

313 <sup>a</sup> We constructed this variable using data from the Million Hearts Data Registry.

## Supplement: Effects of the Million Hearts Model

314 <sup>b</sup> For the model population, we included an interaction term between this variable and the high-risk group indicator, in addition to the  
315 high-risk group indicator itself, in models that included both high- and medium-risk beneficiaries. For the attributed population, we  
316 interacted this variable with the probability of belonging to the high-risk group.

317 <sup>c</sup> For each model beneficiary, we estimated the amount of CVD risk that could be eliminated within one year of model entry if all  
318 modifiable risk factors were addressed. Modifiable risk factors were based on the ABCS of heart health— taking aspirin, controlling  
319 systolic blood pressure, managing LDL cholesterol, and not smoking. Estimates of risk reduction were based on the novel  
320 longitudinal risk calculator created for the Million Hearts Model.

321 <sup>d</sup> For the model population, we interacted CVD risk group and modifiable CVD risk by three organization size categories: 1 to 5  
322 practitioners, 6 to 19 practitioners, or 20 or more practitioners. For the attributed population, we interacted predicted CVD risk by  
323 organization size using the same three categories.

324 <sup>e</sup> To account for missing values, we included an indicator for missing data in the regression model.

325 <sup>f</sup> For the population of attributed beneficiaries, we defined these variables according to the date of the visit that led to the beneficiary  
326 being attributed to the participating organization (in place of the date of model entry).

327 <sup>g</sup> The distribution of beneficiaries by race and ethnicity is based on their predicted probabilities of falling into each category. The  
328 RAND Corporation developed the predicted probabilities from its Medicare Bayesian Improved Surname Geocoding (MBISG 2.0)  
329 algorithm,<sup>15</sup> which used information from CMS administrative data and beneficiaries' names and characteristics of their Census  
330 blocks to assign each beneficiary probabilities of being non-Hispanic White, non-Hispanic Black, Hispanic, Asian/Pacific Islander,  
331 American Indian/Alaska Native, and multiracial.

332 <sup>h</sup> Before including these variables in the regression models, we standardized each variable to have mean 0 and standard deviation 1.

333 <sup>i</sup> For the population of attributed beneficiaries, we defined these variables according to characteristics of the organization or  
334 practitioner the beneficiary was attributed to (in place of the organization or practitioner that entered the beneficiary into the model).

335 <sup>j</sup> To estimate organizational-level mean Medicare spending and use per beneficiary, we used only baseline data from the  
336 beneficiaries entering the model in 2017. Because many of the 2017 intervention group beneficiaries entered the model within the  
337 first few months of the year, their baseline period is more likely to span the period before the intervention started and, importantly,  
338 before the model might have affected the use and expenditures for the Medicare beneficiaries associated with organizations  
339 participating in the model. The organization-level means included in the regression models are the variance-shrunken means for  
340 each organization.

341 Abbreviations: AMI = acute myocardial infarction; CAH = critical access hospital; CMS = Centers for Medicare & Medicaid Services;  
342 CVD = cardiovascular disease; ED = emergency department; FFS = fee-for-service; FQHC = federally qualified health center; HCC  
343 = hierarchical condition category; HDL = high-density lipoprotein; HHS = U.S. Department of Health and Human Services; LDL =  
344 low-density lipoprotein; mg/dL = milligrams per deciliter; mmHg = millimeters of mercury; RHC = rural health center; SVI = Social  
345 Vulnerability Index.

346 **eMethods 6. Identifying and analyzing outcomes among beneficiaries attributed to**  
347 **intervention and control organizations**

348 In sensitivity analyses, we estimated intervention–control differences in outcomes among a population we defined  
349 by attributing Medicare FFS beneficiaries to the participating organizations using Medicare claims and enrollment  
350 data. This approach limited potential biases that could stem from differences in the types of beneficiaries whom the  
351 organizations chose to enter into the model, because the analysis included all eligible beneficiaries (to the extent we  
352 could replicate eligibility in Medicare data)—whether or not they actually entered the model.

353 In brief, the process for defining the population of attributed beneficiaries and analyzing their outcomes had three  
354 major components.

- 355 1. We used claims data to attribute Medicare FFS beneficiaries to participating organizations based on visits to  
356 those organizations. Specifically, we identified all Medicare FFS beneficiaries who, according to Medicare  
357 claims data, had office or clinic visits with one of the practitioners at an intervention or control organization that  
358 entered at least one beneficiary in the Million Hearts Model in 2017 or 2018. (Participating practitioners  
359 covered a range of specialties: 58% of high- and medium-risk beneficiaries were entered into the model by a  
360 primary care physician; 27% by a cardiologist; 3% by a physician with another specialty; and 11% by a non-  
361 physician [for example, a nurse practitioner or physician’s assistant].) Visits had to occur during the period the  
362 practitioner actively participated in the model. Then we limited the attributed population to beneficiaries who  
363 met Million Hearts Model eligibility criteria, to the extent we could replicate those criteria in Medicare claims  
364 or enrollment data (for example, ages 40 to 79, with no previous myocardial infarction or stroke or TIA, no  
365 ESRD, and not in hospice) on the date of their first visit with the practitioner and organization they were  
366 attributed to. To assess previous myocardial infarction or stroke, we used data from the CMS Medicare  
367 Beneficiary Summary File chronic conditions segment about the first date, if any, that a beneficiary met the  
368 criteria for having a myocardial infarction or stroke based on Medicare FFS claims history going back as far as  
369 1999. eFigure 1 provides sample sizes at different stages in this process.
- 370 2. Using an algorithm we developed, we used a person’s claims-based characteristics at baseline to predict his or  
371 her (1) baseline CVD risk score; and (2) probabilities of being in the high-, medium-, and low-risk groups. We  
372 made these predictions because many of the beneficiaries in the attribution-based study population did not have  
373 data submitted to the Million Hearts Data Registry, so we could not observe clinical data to construct a true  
374 CVD risk score. We developed the risk prediction algorithm using data from the 2017 and 2018 model  
375 beneficiaries, for whom we had both clinical and claims data. We considered a range of candidate models and  
376 chose the model that performed best on relevant cross-validated metrics. (Random forest regression and  
377 gradient boosting classifier algorithms performed best at predicting baseline risk scores and risk groups,  
378 respectively.)
- 379 3. We estimated the mean difference in average outcomes (or hazard ratios) between beneficiaries attributed to  
380 intervention and control organizations. Because the population of attributed beneficiaries included beneficiaries  
381 of any risk level, we applied weights to the data for the attribution-based population to reflect either high- and  
382 medium-risk or high-risk beneficiaries, depending on the analysis. (The weight equaled, respectively, [1] the  
383 predicted probability the beneficiary was in the high-risk group plus the predicted probability the beneficiary  
384 was in the medium-risk group or [2] the predicted probability the beneficiary was in the high-risk group).  
385 Besides using weights, the regression models we used for these analyses were largely the same as those in the  
386 main analysis. The main difference in the model specification was that we had to substitute a few registry-based  
387 covariates (for example, clinical values such as blood pressure) with proxies available in claims data. See  
388 eMethods 5 for a complete list of the regression covariates.

389 The intervention and control group organizations entered roughly half the beneficiaries who visited the  
390 organizations in 2017 and 2018 and appeared to be eligible for the Million Hearts Model, based on their age and  
391 clinical characteristics observed in Medicare claims and enrollment data.

392 To compare our estimates obtained with the attributed beneficiaries to those obtained in our main analysis, we  
393 adjusted the output to account for the fact that not all beneficiaries in the attribution-based intervention group were  
394 entered into the model. Specifically, we divided the estimated regression-adjusted intervention–control difference by



## Supplement: Effects of the Million Hearts Model

395 the model entry rate. The validity of this adjustment relies heavily on the assumption that the model had no spillover  
396 effects to beneficiaries attributed to the organization but not entered in the model.

397 Although we used the attribution-based results primarily as a check for the main results, some might be interested in  
398 the attribution-based results in their own right. These estimates reflected our best estimate of the effects of the model  
399 among all Medicare beneficiaries eligible for the model who had office or clinic visits with participating  
400 practitioners, regardless of whether the practitioners' organization entered them into the model.

401 **eTable 1. Characteristics of organizations that entered at least one beneficiary**  
 402 **in the Million Hearts Model (2017–2018) versus those that were**  
 403 **randomized but did not enter beneficiaries into the model**

| Characteristic                                                                                            | Intervention organizations      |                                      | Control organizations           |                                      |
|-----------------------------------------------------------------------------------------------------------|---------------------------------|--------------------------------------|---------------------------------|--------------------------------------|
|                                                                                                           | Entered beneficiaries (N = 173) | Did not enter beneficiaries (N = 87) | Entered beneficiaries (N = 172) | Did not enter beneficiaries (N = 84) |
| <b>Organization size (reported on Million Hearts Model application)</b>                                   |                                 |                                      |                                 |                                      |
| Total practitioners, median (q1, q3)                                                                      | 10 (3, 30)                      | 10 (3, 31)                           | 11 (4, 30)                      | 8 (2, 29)                            |
| Total sites, median (q1, q3)                                                                              | 3 (1, 7)                        | 3 (1, 6)                             | 3 (1, 7)                        | 2 (1, 6)                             |
| <b>Location</b>                                                                                           |                                 |                                      |                                 |                                      |
| No. (%) rural                                                                                             | 79 (46)                         | 51 (59)                              | 80 (47)                         | 31 (37)                              |
| No. (%) in each Census region                                                                             |                                 |                                      |                                 |                                      |
| South                                                                                                     | 65 (38)                         | 27 (31)                              | 68 (40)                         | 27 (32)                              |
| Northeast                                                                                                 | 52 (30)                         | 17 (20)                              | 41 (24)                         | 26 (31)                              |
| Midwest                                                                                                   | 29 (17)                         | 28 (32)                              | 35 (20)                         | 16 (19)                              |
| West                                                                                                      | 26 (15)                         | 15 (17)                              | 28 (16)                         | 14 (17)                              |
| U.S. Territory                                                                                            | 1 (1)                           | 0 (0)                                | 0 (0)                           | 1 (1)                                |
| <b>Organization type<sup>a</sup></b>                                                                      |                                 |                                      |                                 |                                      |
| No. (%) primary care                                                                                      | 90 (52)                         | 32 (37)                              | 95 (55)                         | 31 (37)                              |
| No. (%) specialty or multispecialty                                                                       | 39 (23)                         | 22 (25)                              | 35 (20)                         | 23 (27)                              |
| No. (%) of federally qualified health centers, rural health clinics, or other health centers <sup>b</sup> | 26 (15)                         | 11 (13)                              | 25 (15)                         | 12 (14)                              |
| No. (%) hospital                                                                                          | 18 (10)                         | 20 (23)                              | 17 (10)                         | 13 (15)                              |
| No. (%) other/unknown                                                                                     | 0 (0)                           | 2 (2)                                | 0 (0)                           | 5 (6)                                |
| <b>Participating in other CMS models or programs when applied for the Million Hearts Model</b>            |                                 |                                      |                                 |                                      |
| No. (%) in one or more CMS initiative (or application pending at random assignment)                       | 88 (51)                         | 35 (40)                              | 84 (49)                         | 28 (33)                              |
| No. (%) participating in the Medicare Shared Savings Program                                              | 51 (29)                         | 18 (21)                              | 37 (22)                         | 11 (13)                              |

404 <sup>a</sup> Organization type is based on data from the organizations' Million Hearts Model applications linked to the CMS National Plan &  
 405 Provider Enumeration System.

406 <sup>b</sup> "Other health centers" include Indian health and migrant health centers.

407 <sup>c</sup> Hospital sites were outpatient clinics within hospitals. The National Provider Identifier Type 2 organization taxonomy codes that we  
 408 used to categorize the organizations does not distinguish hospitals' primary care clinics from their specialty care clinics.

409 Abbreviations: CMS = Centers for Medicare & Medicaid Services; q1 = quartile 1 (25th percentile) value; q3 = quartile 3 (75th  
 410 percentile) value; SD = standard deviation.

411

412  
413

**eFigure 1. Flow of organizations and attributed beneficiaries from randomization through analysis**

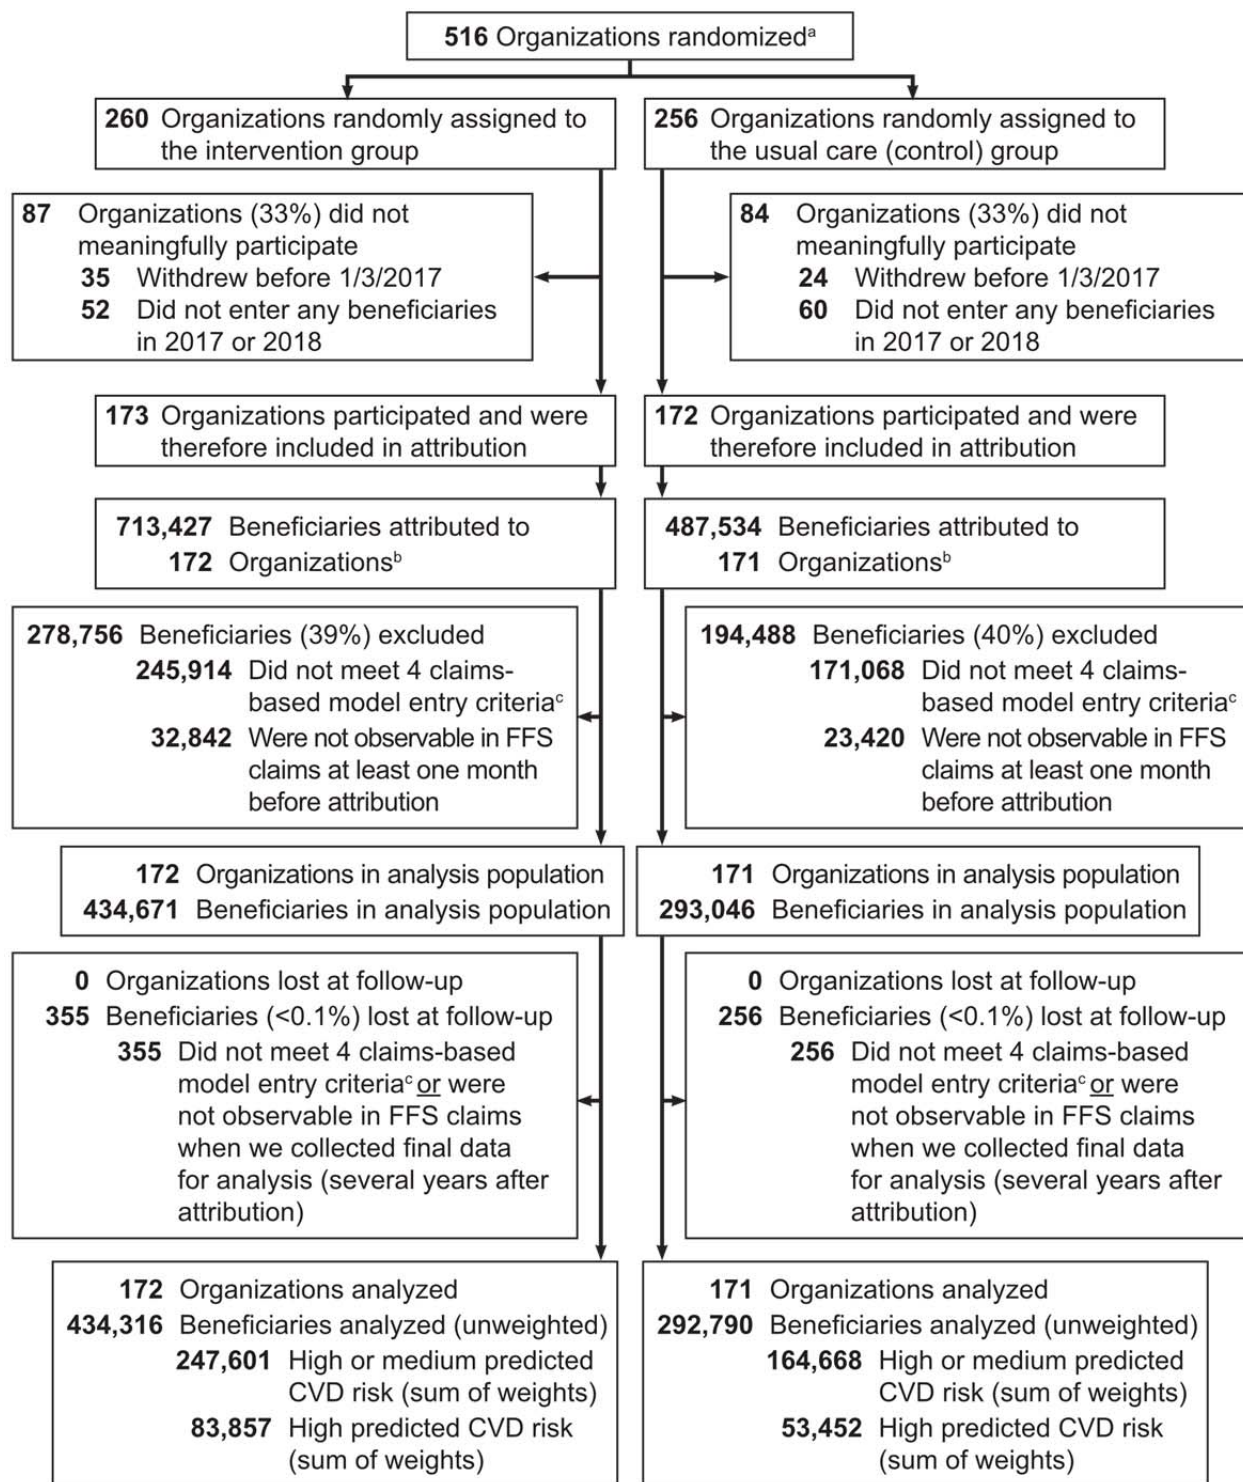

414  
415  
416  
417  
418

<sup>a</sup> CMS received 762 applications, but 246 organizations were not eligible or did not sign a participation agreement.

<sup>b</sup> One intervention organization and one control organization did not have any beneficiaries attributed to them. In the control group, the number of participating practitioners per organization was capped at 20. This resulted in fewer beneficiaries per organization, on average, in the control group versus the intervention group.

## Supplement: Effects of the Million Hearts Model

419 ° The criteria are ages 40 to 79, no prior acute myocardial infarction, no prior stroke, no end-stage renal disease, and no hospice.  
420 Abbreviations: CMS = Centers for Medicare & Medicaid Services; CVD = cardiovascular disease; FFS = fee-for-service.

421  
422  
423

**eTable 2. Baseline characteristics of Medicare beneficiaries entered into the model in 2017 or 2018 (with high, medium, or low CVD risk) versus beneficiaries attributed but not entered into the model<sup>a</sup>**

| Characteristic                                                                                 | Intervention group                 |                                               | Control group                      |                                               |
|------------------------------------------------------------------------------------------------|------------------------------------|-----------------------------------------------|------------------------------------|-----------------------------------------------|
|                                                                                                | Entered the model<br>(N = 228,020) | Attributed but did not enter<br>(N = 206,590) | Entered the model<br>(N = 154,101) | Attributed but did not enter<br>(N = 138,915) |
| <b>Demographics and socioeconomic status</b>                                                   |                                    |                                               |                                    |                                               |
| Age, <sup>b</sup> median (q1, q3), years                                                       | 69 (66, 73)                        | 69 (65, 73)                                   | 69 (66, 73)                        | 69 (65, 73)                                   |
| No. (%) with Black race <sup>c</sup>                                                           | 18,000 (8)                         | 18,490 (9)                                    | 10,569 (7)                         | 13,631 (10)                                   |
| No. (%) female <sup>b</sup>                                                                    | 127,998 (56)                       | 112,084 (54)                                  | 85,037 (55)                        | 75,599 (54)                                   |
| No. (%) male <sup>b</sup>                                                                      | 100,022 (44)                       | 94,506 (46)                                   | 69,064 (45)                        | 63,316 (46)                                   |
| No. (%) dually eligible for Medicaid <sup>b</sup>                                              | 32,211 (14)                        | 33,909 (16)                                   | 22,949 (15)                        | 25,620 (18)                                   |
| <b>Risk factors for myocardial infarction and stroke<sup>d</sup></b>                           |                                    |                                               |                                    |                                               |
| No. (%) with diabetes                                                                          | 62,979 (28)                        | 55,961 (27)                                   | 43,059 (28)                        | 37,640 (27)                                   |
| No. (%) with ischemic heart disease                                                            | 56,100 (25)                        | 61,715 (30)                                   | 40,453 (26)                        | 39,409 (28)                                   |
| No. (%) with hypertension                                                                      | 150,050 (66)                       | 129,237 (63)                                  | 101,293 (66)                       | 87,113 (63)                                   |
| No. (%) with hyperlipidemia                                                                    | 102,840 (45)                       | 85,784 (42)                                   | 70,981 (46)                        | 56,411 (41)                                   |
| <b>Medication use<sup>e</sup></b>                                                              |                                    |                                               |                                    |                                               |
| No. (%) with Medicare Part D prescription drug coverage                                        | 149,223 (65)                       | 129,838 (63)                                  | 100,666 (65)                       | 86,446 (62)                                   |
| No. (%) among those with Part D coverage) with antihypertensive use                            | 108,262 (73)                       | 92,353 (71)                                   | 72,814 (72)                        | 61,578 (71)                                   |
| No. (%) among those with Part D coverage) with statin use                                      | 84,328 (57)                        | 69,319 (53)                                   | 57,565 (57)                        | 44,651 (52)                                   |
| Low intensity                                                                                  | 8,940 (6)                          | 6,787 (5)                                     | 6,062 (6)                          | 4,463 (5)                                     |
| Medium intensity                                                                               | 52,508 (35)                        | 41,737 (32)                                   | 35,146 (35)                        | 26,332 (30)                                   |
| High intensity                                                                                 | 22,880 (15)                        | 20,795 (16)                                   | 16,357 (16)                        | 13,856 (16)                                   |
| <b>Model-qualifying visits<sup>f</sup></b>                                                     |                                    |                                               |                                    |                                               |
| No. (%) whose first model-qualifying visit was with a primary care physician                   | 142,593 (63)                       | 91,055 (44)                                   | 99,977 (65)                        | 75,309 (54)                                   |
| No. (%) whose first model-qualifying visit was with a cardiologist                             | 53,252 (23)                        | 81,798 (40)                                   | 35,366 (23)                        | 46,061 (33)                                   |
| <b>Health care service use in the year before attribution<sup>d</sup></b>                      |                                    |                                               |                                    |                                               |
| Total Medicare Parts A and B spending, median (q1, q3), dollars per beneficiary per month      | 192 (70, 506)                      | 229 (75, 668)                                 | 186 (68, 493)                      | 212 (69, 631)                                 |
| All-cause hospitalizations, mean (SD), per 1,000 people per year <sup>g</sup>                  | 181 (959)                          | 273 (2,036)                                   | 183 (1,135)                        | 271 (1,653)                                   |
| Circulatory system-related hospitalizations, mean (SD), per 1,000 people per year <sup>g</sup> | 35 (335)                           | 58 (985)                                      | 38 (747)                           | 58 (642)                                      |
| All-cause ED visits, mean (SD), per                                                            | 435 (1,608)                        | 582 (2,534)                                   | 424 (1,701)                        | 614 (3,193)                                   |

| Characteristic                                                                                                                        | Intervention group                 |                                               | Control group                      |                                               |
|---------------------------------------------------------------------------------------------------------------------------------------|------------------------------------|-----------------------------------------------|------------------------------------|-----------------------------------------------|
|                                                                                                                                       | Entered the model<br>(N = 228,020) | Attributed but did not enter<br>(N = 206,590) | Entered the model<br>(N = 154,101) | Attributed but did not enter<br>(N = 138,915) |
| 1,000 people per year <sup>g</sup>                                                                                                    |                                    |                                               |                                    |                                               |
| Circulatory system-related ED visits, mean (SD), per 1,000 people per year <sup>g</sup>                                               | 25 (466)                           | 39 (437)                                      | 25 (245)                           | 42 (1,085)                                    |
| Office visits, median (q1, q3), per person per year                                                                                   | 7 (3, 12)                          | 7 (3, 13)                                     | 6 (3, 12)                          | 7 (3, 13)                                     |
| Office visits with a practitioner listed on the organization's Million Hearts Model application, median (q1, q3), per person per year | 1 (0, 3)                           | 0 (0, 2)                                      | 1 (0, 3)                           | 0 (0, 2)                                      |

424 <sup>a</sup> We limited this analysis to attributed beneficiaries—that is, beneficiaries who, in 2017 or 2018, visited a practitioner participating in  
 425 the Million Hearts Model, and who met model eligibility criteria we could replicate in Medicare claims and enrollment data. We  
 426 described those eligibility criteria and the methods used to attribute beneficiaries earlier in this supplement (eMethods 6). We  
 427 excluded CVD risk factors from this table if we could not observe those risk factors using Medicare claims or enrollment data; we do  
 428 not have clinical data from the Million Hearts Data Registry for beneficiaries not in the model.

429 <sup>b</sup> Based on data from the Medicare enrollment database.

430 <sup>c</sup> Based on probabilities of Black race from the RAND Medicare Bayesian Improved Surname Geocoding race and ethnicity file.

431 <sup>d</sup> Based on Medicare Parts A and B claims.

432 <sup>e</sup> Based on Medicare Part D claims.

433 <sup>f</sup> Based on Medicare claims data linked to specialty information in the National Plan & Provider Enumeration System.

434 <sup>g</sup> We show means per 1,000 people rather than medians per person because the median, q1, and q3 values per person were all 0.

435 Abbreviations: CVD = cardiovascular disease; ED = emergency department; q1 = quartile 1 (25th percentile) value; q3 = quartile 3  
 436 (75th percentile) value; SD = standard deviation.

437

438 **eTable 3. Effects of the Million Hearts Model on deaths, by cause, within four years of model entry**

| Percentage of people who died within 4 years after model entry, by cause of death | Unadjusted means   |               | Difference |                        |                     |         |
|-----------------------------------------------------------------------------------|--------------------|---------------|------------|------------------------|---------------------|---------|
|                                                                                   | Intervention group | Control group | Unadjusted | Adjusted (90% CI)      | Percent -age effect | p-value |
| <b>High- and medium-risk beneficiaries</b>                                        |                    |               |            |                        |                     |         |
| All cause <sup>a</sup>                                                            | 10.1               | 10.7          | -0.65      | -0.48 (-0.77 to -0.18) | -4.5%               | 0.009   |
| Circulatory system conditions <sup>b</sup>                                        | 2.8                | 3.0           | -0.24      | -0.19 (-0.35 to -0.03) | -6.4%               | 0.05    |
| CHD or cerebrovascular                                                            | 1.6                | 1.9           | -0.22      | -0.19 (-0.32 to -0.07) | -10.6%              | 0.009   |
| CHD                                                                               | 1.3                | 1.5           | -0.18      | -0.18 (-0.29 to -0.06) | -11.9%              | 0.01    |
| Cerebrovascular                                                                   | 0.3                | 0.4           | -0.04      | -0.02 (-0.06 to +0.03) | -4.8%               | 0.58    |
| Other circulatory system conditions                                               | 1.2                | 1.2           | -0.02      | +0.00 (-0.09 to +0.10) | +0.4%               | 0.95    |
| Noncirculatory or unknown cause                                                   | 7.3                | 7.7           | -0.41      | -0.29 (-0.53 to -0.04) | -3.8%               | 0.06    |
| <b>High-risk beneficiaries</b>                                                    |                    |               |            |                        |                     |         |
| All cause <sup>a</sup>                                                            | 13.5               | 13.7          | -0.24      | +0.02 (-0.51 to +0.55) | +0.1%               | 0.95    |
| Circulatory-system conditions <sup>b</sup>                                        | 3.9                | 4.2           | -0.26      | -0.26 (-0.59 to +0.07) | -6.3%               | 0.19    |
| CHD or cerebrovascular                                                            | 2.4                | 2.6           | -0.26      | -0.24 (-0.50 to +0.03) | -9.1%               | 0.14    |
| CHD                                                                               | 1.9                | 2.2           | -0.27      | -0.32 (-0.57 to -0.07) | -14.4%              | 0.03    |
| Cerebrovascular                                                                   | 0.5                | 0.5           | +0.01      | +0.08 (-0.01 to +0.17) | +21.0%              | 0.12    |
| Other circulatory system conditions                                               | 1.5                | 1.5           | +0.00      | -0.03 (-0.21 to +0.16) | -1.6%               | 0.82    |
| Noncirculatory or unknown cause                                                   | 9.6                | 9.6           | +0.02      | +0.28 (-0.16 to +0.72) | +3.0%               | 0.29    |

439 <sup>a</sup> All-cause mortality results presented in this table are from the same multinomial logistic regression model as the cause-specific results.

440 <sup>b</sup> See eMethods 3 for classifications of cause of death, based on the underlying cause of death information listed in the National Death Index.

441 Abbreviations: CHD = coronary heart disease; CI = confidence interval.

442  
443

**eTable 4. Effects of the Million Hearts Model on first-time myocardial infarctions and strokes using alternative claims-based definitions**

| Outcome                                                                               | High- and medium-risk group |         |                 |                             |                                   |             | High-risk group   |         |                       |                             |                                   |             |
|---------------------------------------------------------------------------------------|-----------------------------|---------|-----------------|-----------------------------|-----------------------------------|-------------|-------------------|---------|-----------------------|-----------------------------|-----------------------------------|-------------|
|                                                                                       | Unadjusted rate             |         | Hazard ratio    |                             |                                   |             | Unadjusted rate   |         | Hazard ratio          |                             |                                   |             |
|                                                                                       | Inter-<br>vention           | Control | Un-<br>adjusted | Adjusted<br>(90% CI)        | Percentage<br>effect <sup>a</sup> | p-<br>value | Inter-<br>vention | Control | Un-<br>adjusted<br>HR | Adjusted<br>HR<br>(90% CI)  | Percentage<br>effect <sup>a</sup> | p-<br>value |
| Primary outcome: first-time myocardial infarctions, strokes, and TIAs <sup>b</sup>    | 15.8                        | 17.0    | HR = 0.925      | HR = 0.967 (0.935 to 0.999) | -3.3%                             | 0.09        | 21.3              | 22.7    | HR = 0.937            | HR = 0.987 (0.943 to 1.033) | -1.3%                             | 0.63        |
| First-time myocardial infarctions and strokes using narrower definition <sup>c</sup>  | 13.0                        | 14.2    | HR = 0.918      | HR = 0.961 (0.926 to 0.997) | -3.9%                             | 0.07        | 17.9              | 19.2    | HR = 0.932            | HR = 0.990 (0.943 to 1.039) | -1.0%                             | 0.72        |
| First-time myocardial infarctions and strokes using narrowest definition <sup>d</sup> | 12.0                        | 13.1    | HR = 0.918      | HR = 0.964 (0.927 to 1.002) | -3.6%                             | 0.12        | 16.4              | 17.7    | HR = 0.928            | HR = 0.989 (0.939 to 1.042) | -1.1%                             | 0.73        |

444 <sup>a</sup> The percent effect is  $(HR - 1) \times 100\%$

445 <sup>b</sup> Myocardial infarctions, strokes, TIAs, or stroke symptoms, using primary diagnoses on outpatient ED claims or primary and secondary diagnoses on inpatient claims. For myocardial  
446 infarctions, we include all five types of acute myocardial infarctions described in the Fourth Universal Definition of Myocardial Infarction.<sup>3</sup>

447 <sup>c</sup> Myocardial infarctions and strokes only (excludes TIAs or stroke syndromes), using primary diagnoses on outpatient ED claims or primary and secondary diagnoses on inpatient  
448 claims. For myocardial infarctions, we include only the first type of acute myocardial infarctions described in the Fourth Universal Definition of Myocardial Infarction.<sup>3</sup>

449 <sup>d</sup> Myocardial infarctions and strokes only (excludes TIAs or stroke syndromes) listed as primary diagnosis on ED or inpatient claim. For myocardial infarctions, we include only the first  
450 type of acute myocardial infarctions described in the Fourth Universal Definition of Myocardial Infarction.<sup>3</sup>

451 Abbreviations: CI = confidence interval; ED = emergency department; HR = hazard ratio; TIA = transient ischemic attack.



452 **eTable 5. Effects of the Million Hearts Model on binary measures of health events (logistic regression results)**

| Outcome                                                                                                                         | High- and medium-risk group |         |             |                        |                                |         | High-risk group  |         |             |                        |                                |         |
|---------------------------------------------------------------------------------------------------------------------------------|-----------------------------|---------|-------------|------------------------|--------------------------------|---------|------------------|---------|-------------|------------------------|--------------------------------|---------|
|                                                                                                                                 | Unadjusted means            |         | Difference  |                        |                                |         | Unadjusted means |         | Difference  |                        |                                |         |
|                                                                                                                                 | Inter-vention               | Control | Un-adjusted | Adjusted (90% CI)      | Percentage effect <sup>a</sup> | p-value | Inter-vention    | Control | Un-adjusted | Adjusted (90% CI)      | Percentage effect <sup>a</sup> | p-value |
| <b>Percentage with first-time myocardial infarction, stroke, or TIA (from Medicare claims only)</b>                             |                             |         |             |                        |                                |         |                  |         |             |                        |                                |         |
| Within one year of model entry                                                                                                  | 1.4                         | 1.4     | -0.0        | +0.0<br>(-0.1 to +0.1) | +1.6%                          | 0.69    | 1.9              | 1.9     | +0.0        | +0.1<br>(-0.1 to +0.3) | +5.5%                          | 0.34    |
| Within two years of model entry                                                                                                 | 2.8                         | 3.0     | -0.2        | -0.0<br>(-0.1 to +0.1) | -0.5%                          | 0.86    | 3.8              | 4.0     | -0.2        | -0.0<br>(-0.3 to +0.2) | -0.6%                          | 0.87    |
| Within three years of model entry                                                                                               | 4.1                         | 4.4     | -0.3        | -0.1<br>(-0.3 to +0.1) | -2.2%                          | 0.38    | 5.5              | 5.9     | -0.4        | -0.1<br>(-0.4 to +0.2) | -2.0%                          | 0.52    |
| Within four years of model entry                                                                                                | 5.3                         | 5.8     | -0.4        | -0.2<br>(-0.4 to -0.0) | -4.1%                          | 0.07    | 7.0              | 7.5     | -0.5        | -0.3<br>(-0.7 to +0.1) | -4.0%                          | 0.18    |
| <b>Percentage with first-time myocardial infarction, stroke, or TIA, including deaths due to CHD or cerebrovascular disease</b> |                             |         |             |                        |                                |         |                  |         |             |                        |                                |         |
| Within one year of model entry                                                                                                  | 1.6                         | 1.7     | -0.1        | -0.0<br>(-0.1 to +0.1) | -0.9%                          | 0.80    | 2.2              | 2.2     | -0.0        | +0.1<br>(-0.1 to +0.3) | +3.1%                          | 0.57    |
| Within two years of model entry                                                                                                 | 3.3                         | 3.5     | -0.2        | -0.1<br>(-0.2 to +0.1) | -1.5%                          | 0.57    | 4.6              | 4.8     | -0.2        | -0.0<br>(-0.3 to +0.2) | -0.6%                          | 0.87    |
| Within three years of model entry                                                                                               | 5.0                         | 5.3     | -0.3        | -0.1<br>(-0.3 to -0.0) | -2.6%                          | 0.23    | 6.7              | 7.1     | -0.4        | -0.1<br>(-0.5 to +0.2) | -2.1%                          | 0.44    |
| Within four years of model entry                                                                                                | 6.5                         | 7.1     | -0.6        | -0.4<br>(-0.6 to -0.1) | -5.3%                          | 0.01    | 8.6              | 9.3     | -0.7        | -0.5<br>(-0.9 to -0.1) | -5.6%                          | 0.04    |
| <b>Percentage who died</b>                                                                                                      |                             |         |             |                        |                                |         |                  |         |             |                        |                                |         |
| Within one year of model entry                                                                                                  | 1.7                         | 1.8     | -0.2        | -0.2<br>(-0.3 to -0.0) | -8.4%                          | 0.03    | 2.1              | 2.2     | -0.1        | -0.1<br>(-0.3 to +0.1) | -4.1%                          | 0.47    |
| Within two years of model entry                                                                                                 | 3.9                         | 4.2     | -0.3        | -0.2<br>(-0.4 to -0.1) | -5.2%                          | 0.02    | 5.2              | 5.3     | -0.1        | +0.0<br>(-0.3 to +0.3) | +0.5%                          | 0.89    |

Supplement: Effects of the Million Hearts Model

| Outcome                              | High- and medium-risk group |         |                 |                           |                                   |         | High-risk group   |         |                 |                           |                                   |         |
|--------------------------------------|-----------------------------|---------|-----------------|---------------------------|-----------------------------------|---------|-------------------|---------|-----------------|---------------------------|-----------------------------------|---------|
|                                      | Unadjusted means            |         | Difference      |                           |                                   |         | Unadjusted means  |         | Difference      |                           |                                   |         |
|                                      | Inter-<br>vention           | Control | Un-<br>adjusted | Adjusted<br>(90% CI)      | Percentage<br>effect <sup>a</sup> | p-value | Inter-<br>vention | Control | Un-<br>adjusted | Adjusted<br>(90% CI)      | Percentage<br>effect <sup>a</sup> | p-value |
| Within three years<br>of model entry | 6.7                         | 7.1     | -0.4            | -0.2<br>(-0.5 to<br>-0.0) | -3.6%                             | 0.06    | 8.9               | 9.2     | -0.3            | +0.1<br>(-0.3 to<br>+0.5) | +0.9%                             | 0.74    |
| Within four years<br>of model entry  | 10.1                        | 10.7    | -0.6            | -0.5<br>(-0.8 to<br>-0.2) | -4.4%                             | 0.01    | 13.5              | 13.7    | -0.2            | +0.1<br>(-0.5 to<br>+0.6) | +0.4%                             | 0.88    |

453 <sup>a</sup> The percentage effect is relative to the regression-adjusted control group mean.  
 454 Abbreviations: CHD = coronary heart disease; CI = confidence interval; TIA = transient ischemic attack.  
 455

456 **eTable 6. Effects of the Million Hearts Model on primary and secondary study outcomes for the trimmed**  
 457 **population,<sup>a</sup> mimicking the control group’s 20-practitioner cap in the intervention group**

| Outcome (unit),<br>by domain                                                                                                         | High- and medium-risk group |         |                      |                                      |                                   |             | High-risk group         |         |                      |                                      |                                   |             |
|--------------------------------------------------------------------------------------------------------------------------------------|-----------------------------|---------|----------------------|--------------------------------------|-----------------------------------|-------------|-------------------------|---------|----------------------|--------------------------------------|-----------------------------------|-------------|
|                                                                                                                                      | Unadjusted rate or mean     |         | HR or difference (Δ) |                                      |                                   |             | Unadjusted rate or mean |         | HR or difference (Δ) |                                      |                                   |             |
|                                                                                                                                      | Inter-<br>vention           | Control | Un-<br>adjusted      | Adjusted<br>(90% CI)                 | Percentage<br>effect <sup>b</sup> | p-<br>value | Inter-<br>vention       | Control | Un-<br>adjusted      | Adjusted<br>(90% CI)                 | Percentage<br>effect <sup>b</sup> | p-<br>value |
| <b>Health events (number per 1,000 person-years)</b>                                                                                 |                             |         |                      |                                      |                                   |             |                         |         |                      |                                      |                                   |             |
| Primary outcome:<br>first-time<br>myocardial<br>infarctions,<br>strokes, and<br>TIAs (from<br>Medicare<br>claims only)               | 16.1                        | 17.0    | HR =<br>0.946        | HR =<br>0.966<br>(0.933 to<br>1.000) | -3.4%                             | 0.10        | 21.7                    | 22.7    | HR =<br>0.952        | HR =<br>0.982<br>(0.934 to<br>1.033) | -1.8%                             | 0.56        |
| First-time<br>myocardial<br>infarctions,<br>strokes, and<br>TIAs, including<br>deaths due to<br>CHD or<br>cerebrovascular<br>disease | 19.1                        | 20.3    | HR =<br>0.939        | HR =<br>0.953<br>(0.923 to<br>0.985) | -4.7%                             | 0.02        | 26.0                    | 27.4    | HR =<br>0.948        | HR =<br>0.970<br>(0.925 to<br>1.017) | -3.0%                             | 0.28        |
| All-cause deaths                                                                                                                     | 28.5                        | 29.6    | HR =<br>0.957        | HR =<br>0.962<br>(0.933 to<br>0.991) | -3.8%                             | 0.03        | 38.6                    | 39.3    | HR =<br>0.977        | HR =<br>0.995<br>(0.953 to<br>1.038) | -0.5%                             | 0.84        |

| Outcome (unit),<br>by domain                                                                                    | High- and medium-risk group |          |                               |                                                       |                                   |             | High-risk group         |            |                               |                                                        |                                   |             |
|-----------------------------------------------------------------------------------------------------------------|-----------------------------|----------|-------------------------------|-------------------------------------------------------|-----------------------------------|-------------|-------------------------|------------|-------------------------------|--------------------------------------------------------|-----------------------------------|-------------|
|                                                                                                                 | Unadjusted rate or mean     |          | HR or difference ( $\Delta$ ) |                                                       |                                   |             | Unadjusted rate or mean |            | HR or difference ( $\Delta$ ) |                                                        |                                   |             |
|                                                                                                                 | Inter-<br>vention           | Control  | Un-<br>adjusted               | Adjusted<br>(90% CI)                                  | Percentage<br>effect <sup>b</sup> | p-<br>value | Inter-<br>vention       | Control    | Un-<br>adjusted               | Adjusted<br>(90% CI)                                   | Percentage<br>effect <sup>b</sup> | p-<br>value |
| <b>Medicare spending (\$ per beneficiary per month)</b>                                                         |                             |          |                               |                                                       |                                   |             |                         |            |                               |                                                        |                                   |             |
| Primary outcome: Medicare spending on first-time myocardial infarctions, strokes, and TIAs and 90-day follow-up | \$38.56                     | \$40.74  | $\Delta = -$<br>\$2.18        | $\Delta = -$<br>\$1.57<br>(-\$3.93 to<br>+\$0.79)     | -3.9%                             | 0.27        | \$51.28                 | \$55.82    | $\Delta =$<br>-\$4.54         | $\Delta =$<br>-\$3.20<br>(-\$7.93 to<br>+\$1.53)       | -5.9%                             | 0.27        |
| Total Medicare Parts A and B spending, before model payments                                                    | \$972.33                    | \$954.61 | $\Delta =$<br>+\$17.72        | $\Delta =$<br>+\$3.73<br>(-\$15.11<br>to<br>+\$22.56) | +0.4%                             | 0.74        | \$1,111.66              | \$1,088.05 | $\Delta =$<br>+\$23.61        | $\Delta =$<br>+\$13.58<br>(-\$15.58<br>to<br>+\$42.75) | +1.2%                             | 0.44        |
| <b>Health care service use (number per 1,000 beneficiaries per year)</b>                                        |                             |          |                               |                                                       |                                   |             |                         |            |                               |                                                        |                                   |             |
| All-cause hospitalizations                                                                                      | 256.8                       | 251.8    | $\Delta = +5.0$               | $\Delta = +9.1$<br>(+3.7 to<br>+14.5)                 | +3.7%                             | 0.006       | 77.3                    | 75.6       | $\Delta = +1.7$               | $\Delta = +3.1$<br>(+0.8 to<br>+5.3)                   | +4.1%                             | 0.03        |
| Circulatory system-related hospitalizations                                                                     | 57.2                        | 57.0     | $\Delta = +0.1$               | $\Delta = +0.7$<br>(-1.2 to<br>+2.5)                  | +1.2%                             | 0.55        | 76.4                    | 75.6       | $\Delta = +0.8$               | $\Delta = +2.3$<br>(-0.9 to<br>+5.4)                   | +3.0%                             | 0.23        |
| All-cause ED visits                                                                                             | 393.1                       | 383.0    | $\Delta =$<br>+10.1           | $\Delta = +8.3$<br>(-1.4 to<br>+18.1)                 | +2.2%                             | 0.16        | 430.3                   | 416.6      | $\Delta =$<br>+13.7           | $\Delta = +14.6$<br>(+2.5 to<br>+26.8)                 | +3.5%                             | 0.05        |
| Circulatory-system-related ED visits                                                                            | 33.7                        | 33.0     | $\Delta = +0.7$               | $\Delta = +0.5$<br>(-1.4 to<br>+2.3)                  | +1.4%                             | 0.68        | 40.4                    | 39.3       | $\Delta = +1.0$               | $\Delta = +1.2$<br>(-1.3 to<br>+3.7)                   | +3.2%                             | 0.42        |

| Outcome (unit),<br>by domain | High- and medium-risk group |          |                               |                                    |                                   |                     | High-risk group         |          |                               |                                    |                                   |                     |
|------------------------------|-----------------------------|----------|-------------------------------|------------------------------------|-----------------------------------|---------------------|-------------------------|----------|-------------------------------|------------------------------------|-----------------------------------|---------------------|
|                              | Unadjusted rate or mean     |          | HR or difference ( $\Delta$ ) |                                    |                                   |                     | Unadjusted rate or mean |          | HR or difference ( $\Delta$ ) |                                    |                                   |                     |
|                              | Inter-<br>vention           | Control  | Un-<br>adjusted<br>$\Delta =$ | Adjusted<br>(90% CI)<br>$\Delta =$ | Percentage<br>effect <sup>b</sup> | <i>p</i> -<br>value | Inter-<br>vention       | Control  | Un-<br>adjusted<br>$\Delta =$ | Adjusted<br>(90% CI)<br>$\Delta =$ | Percentage<br>effect <sup>b</sup> | <i>p</i> -<br>value |
| Office visits                | 10,699.1                    | 10,176.0 | +523.1                        | +101.6<br>(-57.3 to<br>+260.4)     | +1.0%                             | 0.29                | 11,425.1                | 10,879.1 | +546.1                        | +148.2<br>(-53.4 to<br>+349.9)     | +1.3%                             | 0.23                |

458 <sup>a</sup> We trimmed the intervention group to mimic the 20-practitioner cap applied to the control group. Patterns of model entry in the control group suggest that control organizations—faced  
459 with the cap—strategically selected their participating practitioners to be those who could enter the most beneficiaries. We replicated this in the intervention group by (1) identifying  
460 each practitioner who entered a beneficiary at a large intervention organization (with large organizations defined as those with more than 20 practitioners entering beneficiaries into the  
461 model), (2) ranking those practitioners by the number of beneficiaries they entered into the model in 2017 or 2018, (3) selecting the top 20, and (4) removing from the intervention  
462 group any beneficiaries entered by practitioners not ranked in the top 20.

463 <sup>b</sup> For effects on the hazard ratio scale, the percent effect is  $(HR - 1) \times 100\%$ . For effects on the difference scale, the percent effect is relative to the regression-adjusted control group  
464 mean.

465 Abbreviations: CHD = coronary heart disease; CI = confidence interval; ED = emergency department; HR = hazard ratio.

466

467 **eTable 7. Effects of the Million Hearts Model on primary and secondary study outcomes among attributed**  
 468 **beneficiaries**

|                                                                                                                 | Unadjusted rate or mean |            | HR or difference ( $\Delta$ ) |                                           |                             |                 | Implied effect for model population <sup>a</sup> (90% CI) |
|-----------------------------------------------------------------------------------------------------------------|-------------------------|------------|-------------------------------|-------------------------------------------|-----------------------------|-----------------|-----------------------------------------------------------|
|                                                                                                                 | Inter-vention           | Control    | Un-adjusted                   | Adjusted (90% CI)                         | Percent effect <sup>b</sup> | <i>p</i> -value |                                                           |
| <b>Predicted high- and medium-risk group</b>                                                                    |                         |            |                               |                                           |                             |                 |                                                           |
| <b>Health events (number per 1,000 person-years)</b>                                                            |                         |            |                               |                                           |                             |                 |                                                           |
| Primary outcome: first-time myocardial infarctions, strokes, and TIAs (from Medicare claims only)               | 17.6                    | 18.4       | HR = 0.955                    | HR = 0.989 (0.960 to 1.018)               | -1.1%                       | 0.53            | HR = 0.979 (0.926 to 1.035)                               |
| First-time myocardial infarctions, strokes, and TIAs, including deaths due to CHD or cerebrovascular disease    | 21.3                    | 22.2       | HR = 0.959                    | HR = 0.987 (0.959 to 1.015)               | -1.3%                       | 0.44            | HR = 0.975 (0.925 to 1.029)                               |
| All-cause deaths                                                                                                | 33.0                    | 34.1       | HR = 0.965                    | HR = 0.985 (0.961 to 1.009)               | -1.5%                       | 0.01            | HR = 0.972 (0.928 to 1.017)                               |
| <b>Medicare spending (\$ per beneficiary per month)</b>                                                         |                         |            |                               |                                           |                             |                 |                                                           |
| Primary outcome: Medicare spending on first-time myocardial infarctions, strokes, and TIAs and 90-day follow-up | \$42.01                 | \$43.42    | $\Delta =$ -\$1.41            | $\Delta =$ -\$1.04 (-\$3.19 to +\$1.10)   | -2.4%                       | 0.42            | $\Delta =$ -\$1.71 (-\$5.20 to +\$1.79)                   |
| Total Medicare Parts A and B spending, before model payments                                                    | \$1,056.09              | \$1,029.80 | $\Delta =$ +\$26.28           | $\Delta =$ +\$3.21 (-\$16.63 to +\$23.05) | +0.3%                       | 0.79            | $\Delta =$ +\$5.76 (-\$29.72 to +\$41.24)                 |
| <b>Health care service use (number per 1,000 beneficiaries per year)</b>                                        |                         |            |                               |                                           |                             |                 |                                                           |
| All-cause hospitalizations                                                                                      | 284.6                   | 281.8      | $\Delta =$ +2.8               | $\Delta =$ +6.8 (+1.7 to +12.0)           | +2.5%                       | 0.03            | $\Delta =$ +12.2 (+3.1 to +21.4)                          |
| Circulatory system-related hospitalizations                                                                     | 63.9                    | 64.3       | $\Delta =$ -0.4               | $\Delta =$ +1.4 (-0.2 to +2.9)            | +2.2%                       | 0.15            | $\Delta =$ +2.4 (-0.3 to +5.2)                            |
| All-cause ED visits                                                                                             | 423.2                   | 430.5      | $\Delta =$ -7.4               | $\Delta =$ +8.5 (-0.9 to +17.9)           | +2.0%                       | 0.13            | $\Delta =$ +15.2 (-1.5 to +32.0)                          |
| Circulatory system-related ED visits                                                                            | 36.0                    | 36.7       | $\Delta =$ -0.7               | $\Delta =$ +1.6 (-0.3 to +3.5)            | +4.6%                       | 0.17            | $\Delta =$ +2.8 (-0.5 to +6.2)                            |
| Office visits                                                                                                   | 10,881.4                | 10,545.4   | $\Delta =$ +336.0             | $\Delta =$ +21.3 (-133.0 to               | +0.2%                       | 0.82            | $\Delta =$ +38.3 (-237.7 to +314.2)                       |

|                                                                                                             | Unadjusted rate or mean |            | HR or difference ( $\Delta$ ) |                                              |                                |                | Implied effect for model population <sup>a</sup><br>(90% CI) |
|-------------------------------------------------------------------------------------------------------------|-------------------------|------------|-------------------------------|----------------------------------------------|--------------------------------|----------------|--------------------------------------------------------------|
|                                                                                                             | Inter-<br>vention       | Control    | Un-<br>adjusted               | Adjusted<br>(90% CI)                         | Percent<br>effect <sup>b</sup> | $p$ -<br>value |                                                              |
|                                                                                                             |                         |            |                               | +175.7)                                      |                                |                |                                                              |
| <b>Predicted high-risk group</b>                                                                            |                         |            |                               |                                              |                                |                |                                                              |
| <b>Health events (number per 1,000 person-years)</b>                                                        |                         |            |                               |                                              |                                |                |                                                              |
| Primary outcome: first-time myocardial infarctions and strokes (from Medicare claims only)                  | 21.9                    | 23.2       | HR = 0.945                    | HR = 0.992<br>(0.959 to 1.027)               | -0.8%                          | 0.70           | HR = 0.985<br>(0.923 to 1.051)                               |
| First-time myocardial infarctions or strokes, including deaths due to CHD or cerebrovascular disease        | 27.1                    | 28.4       | HR = 0.953                    | HR = 0.989<br>(0.957 to 1.022)               | -1.1%                          | 0.58           | HR = 0.979<br>(0.920 to 1.043)                               |
| All-cause deaths                                                                                            | 42.9                    | 44.6       | HR = 0.960                    | HR = 0.978<br>(0.951 to 1.006)               | -2.2%                          | 0.02           | HR = 0.959<br>(0.910 to 1.011)                               |
| <b>Medicare spending (\$ per beneficiary per month)</b>                                                     |                         |            |                               |                                              |                                |                |                                                              |
| Primary outcome: Medicare spending on first-time myocardial infarctions and strokes and immediate follow-up | \$51.69                 | \$55.46    | $\Delta$ = -\$3.77            | $\Delta$ = -\$2.09<br>(-\$5.19 to +\$1.00)   | -3.9%                          | 0.27           | $\Delta$ = -\$3.47<br>(-\$8.58 to +\$1.64)                   |
| Total Medicare Parts A and B spending, before model payments                                                | \$1,178.07              | \$1,159.50 | $\Delta$ = +\$18.57           | $\Delta$ = +\$0.46<br>(-\$24.48 to +\$25.41) | +0.0%                          | 0.98           | $\Delta$ = +\$0.83<br>(-\$43.71 to +\$45.38)                 |
| <b>Health care service use (number per 1,000 beneficiaries per year)</b>                                    |                         |            |                               |                                              |                                |                |                                                              |
| All-cause hospitalizations                                                                                  | 333.0                   | 333.2      | $\Delta$ = -0.1               | $\Delta$ = +6.6<br>(-0.6 to +13.8)           | +2.0%                          | 0.13           | $\Delta$ = +11.8<br>(-1.0 to +24.6)                          |
| Circulatory system-related hospitalizations                                                                 | 81.2                    | 81.9       | $\Delta$ = -0.7               | $\Delta$ = +2.4<br>(+0.3 to +4.6)            | +3.1%                          | 0.06           | $\Delta$ = +4.4<br>(+0.6 to +8.2)                            |
| All-cause ED visits                                                                                         | 454.6                   | 464.6      | $\Delta$ = -10.0              | $\Delta$ = +6.6<br>(-4.0 to +17.3)           | +1.5%                          | 0.30           | $\Delta$ = +11.9<br>(-7.1 to +30.9)                          |
| Circulatory system-related ED visits                                                                        | 41.1                    | 41.7       | $\Delta$ = -0.6               | $\Delta$ = +2.5<br>(+0.1 to +4.8)            | +6.4%                          | 0.08           | $\Delta$ = +4.4<br>(+0.2 to +8.6)                            |
| Office visits                                                                                               | 11,603.1                | 11,210.8   | $\Delta$ = +392.4             | $\Delta$ = +29.6<br>(-155.7 to +214.9)       | +0.3%                          | 0.79           | $\Delta$ = +53.0<br>(-278.0 to +383.9)                       |

469 <sup>a</sup> These columns present the implied effect for model beneficiaries assuming overall impacts among attributed beneficiaries come solely through the subset of beneficiaries entered into  
 470 the model. We obtained this estimate by dividing the regression model coefficient corresponding to the impact estimate by the percentage of attributed beneficiaries who were entered  
 471 into the model. For effects on the hazard ratio scale, we expressed this scaled regression coefficient as a hazard ratio.

## Supplement: Effects of the Million Hearts Model

472 <sup>b</sup> For effects on the hazard ratio scale, the percent effect is  $(HR - 1) \times 100\%$ . For effects on the difference scale, the percent effect is relative to the regression-adjusted control group  
473 mean.

474 Abbreviations: CHD = coronary heart disease; CI = confidence interval; ED = emergency department; HR = hazard ratio.

475



476 **eFigure 2. Assessment of the influence of Covid-19 on CVD events:<sup>a</sup> County-**  
 477 **level CVD event rates declined similarly in 2020–2021 across the**  
 478 **intervention and control group beneficiaries’ counties, relative to the**  
 479 **average rates in 2018 and 2019 (beneficiaries ages 40 to 79)**

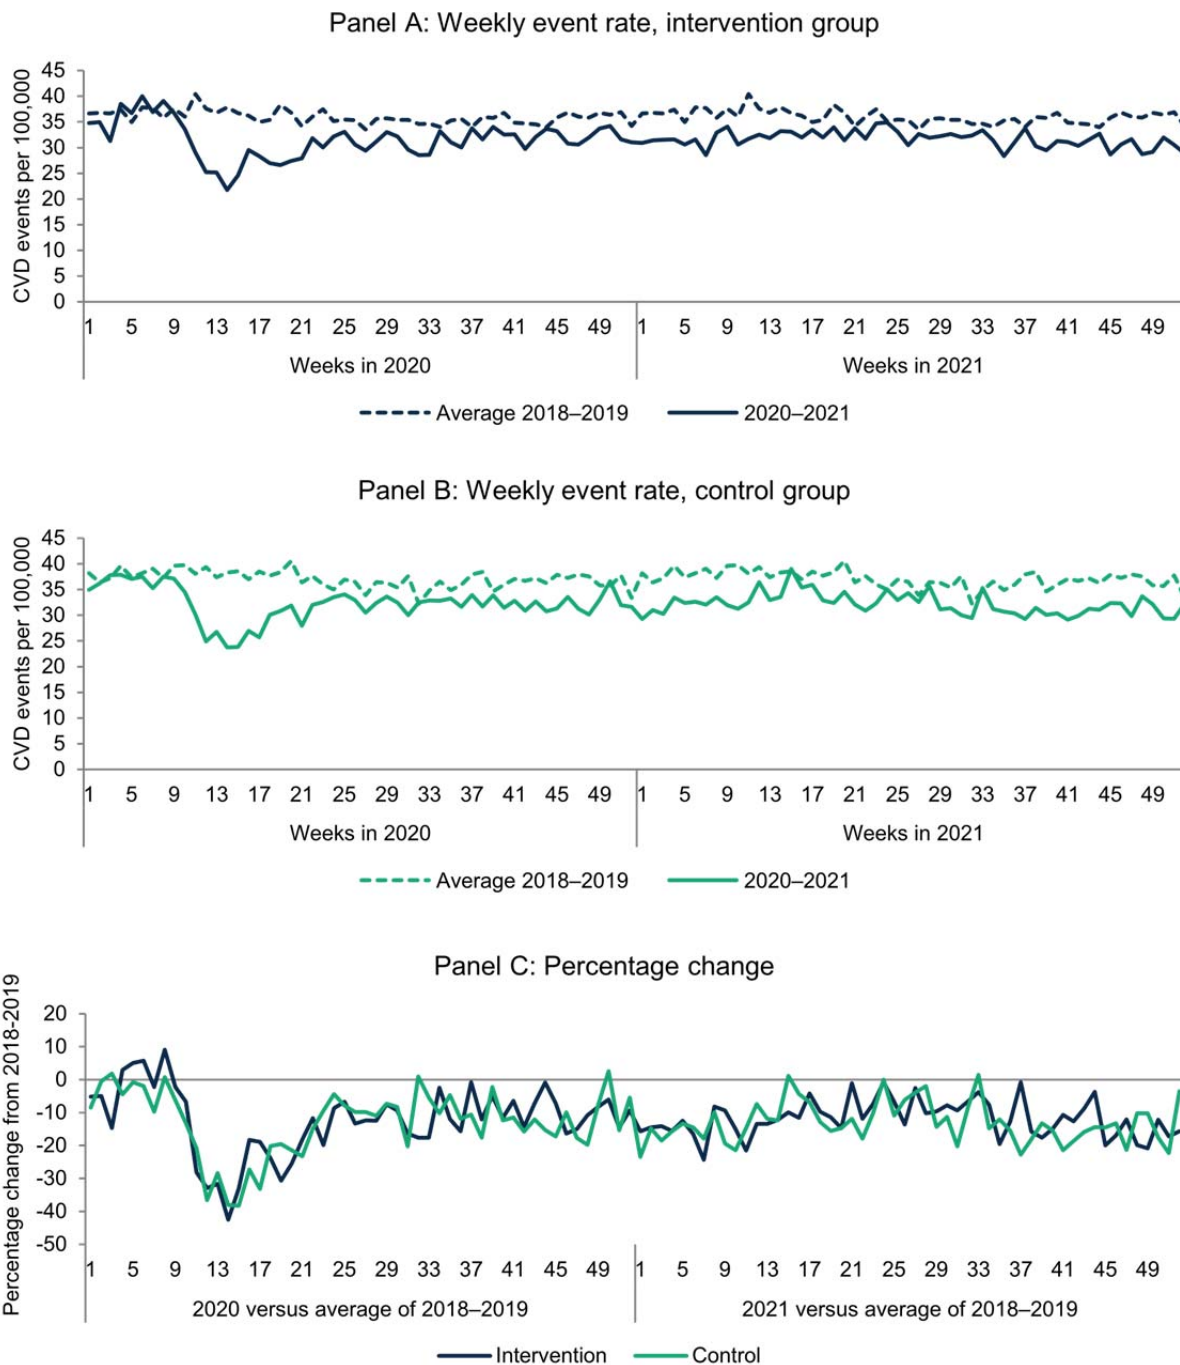

480

481

482

483 <sup>a</sup> Because the distribution of intervention and control group beneficiaries across U.S. counties is not identical, regional differences in  
 484 Covid-19 infection rates or responses to Covid-19 could lead to differences in outcomes between the intervention and control  
 485 groups. To assess the potential for such differences due to Covid-19, we calculated the *county-level* differences in outcome rates in  
 486 each week in 2020 and 2021 versus the average rates for the same week in 2018–2019 among Medicare FFS beneficiaries ages 40  
 487 to 79, with each county weighted by the number of intervention or control group beneficiaries living in that county. The 2018–2019

## Supplement: Effects of the Million Hearts Model

488 rates are repeated along the x-axis, so that, for example, CVD event rates in Week 1 of 2020 and in Week of 2021 are both shown  
489 relative to the same 2018–2019 Week 1 average. The rationale for using weighted county-level rates is to approximate the likely  
490 effects of Covid-19 on outcomes for the actual intervention and control groups based on the counties where intervention and control  
491 beneficiaries live.

492 This figure reflects all CVD events, not only first-time CVD events, due to feasibility challenges identifying first-time events for the full  
493 FFS population. For the rates in Panels A and B, the denominator in each week is the number of Medicare FFS beneficiaries in  
494 each county between the ages of 40 and 79 who were alive and enrolled in Medicare Parts A and B FFS with Medicare as primary  
495 payer at the start of that week. The numerator is the number (among the denominator population) of acute inpatient hospitalizations,  
496 outpatient ED visits, and outpatient observation stays for a myocardial infarction or stroke (excluding diagnosis codes indicating care  
497 only for an earlier myocardial infarction or stroke), based on a relevant claim. The rates in Panel A are weighted by the number of  
498 intervention group beneficiaries in each county. (This figure effectively drops counties with no intervention group beneficiaries.)  
499 Similarly, the rates in Panel B are weighted by the number of control group beneficiaries in each county. (This figure effectively  
500 drops counties with no control group beneficiaries.) Panel C reports the percentage change in weighted rates for each week in 2020  
501 and 2021 versus the average rate for 2018 and 2019 for the same week for each group. Although outcome levels changed  
502 substantially between 2018–2019 and 2020–2021, those changes were extremely similar in regions inhabited by intervention versus  
503 control group beneficiaries. eTable 8 shows that observed intervention–control differences would have only a trivial influence on  
504 estimates of the model's effects.

505 Abbreviations: CVD = cardiovascular disease; ED = emergency department; FFS = fee-for-service.

506 **eFigure 3. Assessment of the influence of Covid-19 on the death rate:<sup>a</sup> The**  
 507 **county-level death rate declined similarly in 2020–2021 across the**  
 508 **intervention and control group beneficiaries' counties, relative to the**  
 509 **average rates in 2018 and 2019 (beneficiaries ages 40 to 79)**

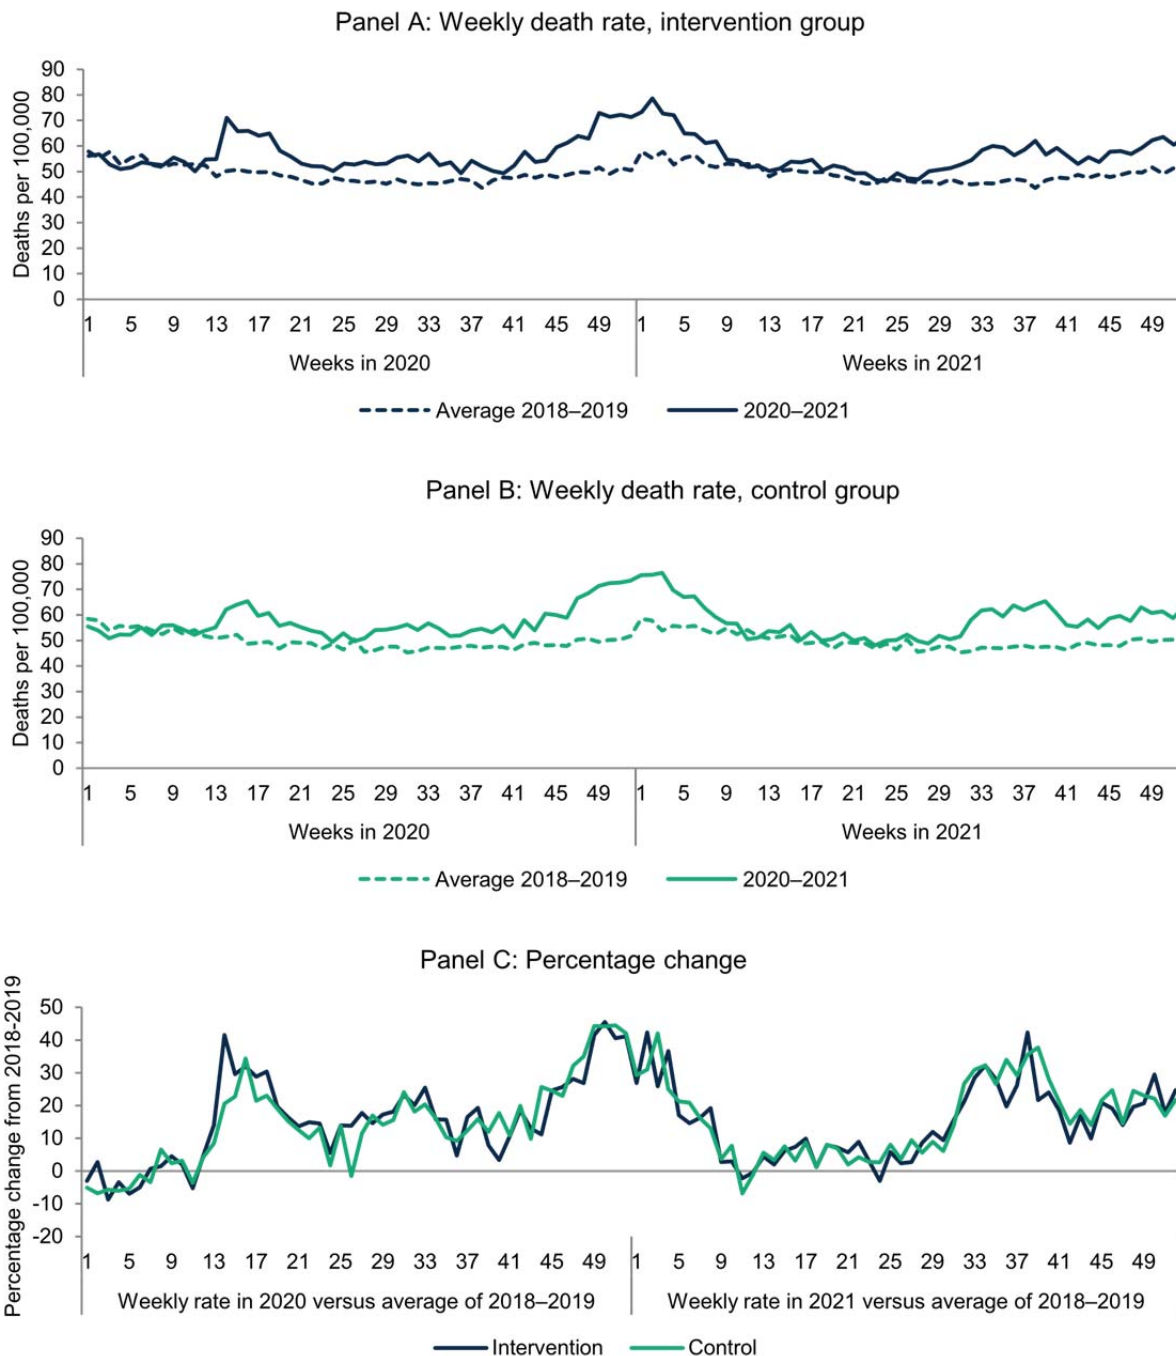

510

511

512

513 <sup>a</sup> As in eFigure 2, this figure reports the percentage change in weighted rates in 2020 and 2021 versus the average rate for 2018  
 514 and 2019 for the same week for each group (intervention versus control). To calculate the death rate for each county, the  
 515 denominator for each week is the number of Medicare FFS beneficiaries in the county between the ages of 40 and 79 who were  
 516 alive and enrolled in Medicare Parts A and B FFS with Medicare as primary payer at the start of that week. The numerator is the  
 517 number of beneficiaries who died during that week among the denominator population. Intervention group weekly rates are weighted

## Supplement: Effects of the Million Hearts Model

518 by the number of intervention group beneficiaries in each county. (This figure effectively drops counties with no intervention group  
519 beneficiaries.) Similarly, control group weekly rates are weighted by the number of control group beneficiaries in each county. (This  
520 figure effectively drops counties with no control group beneficiaries.) Although outcome levels changed substantially between 2018–  
521 2019 and 2020–2021, those changes were extremely similar in regions inhabited by intervention versus control group beneficiaries.  
522 eTable 8 shows that observed intervention–control differences would have only a trivial influence on estimates of the model's  
523 effects.

524 Abbreviations: FFS = fee-for-service.

525 **eFigure 4. Assessment of the influence of Covid-19 on Medicare spending:<sup>a</sup>**  
 526 **County-level Parts A and B spending (per capita) declined similarly**  
 527 **in 2020–2021 across the intervention and control group beneficiaries’**  
 528 **counties, relative to the average rates in 2018 and 2019 (beneficiaries**  
 529 **ages 40 to 79)**

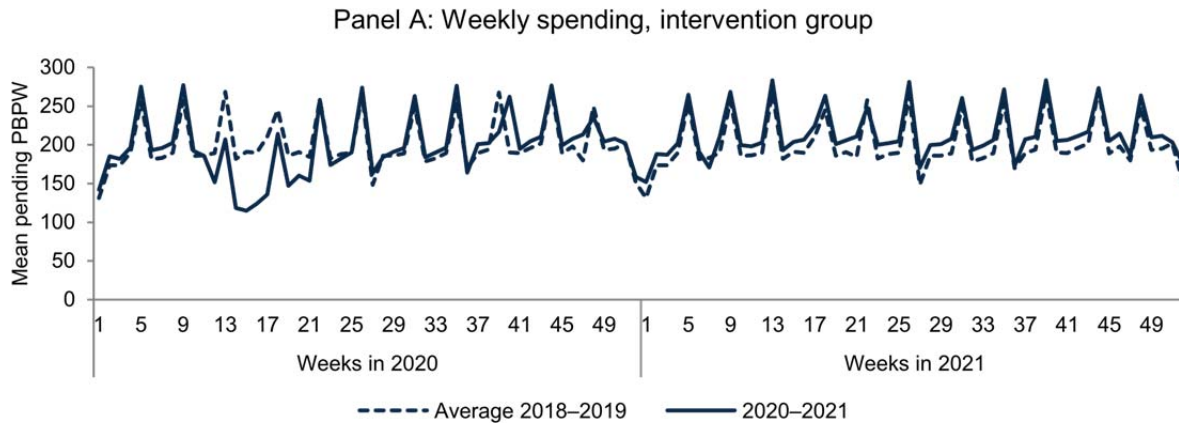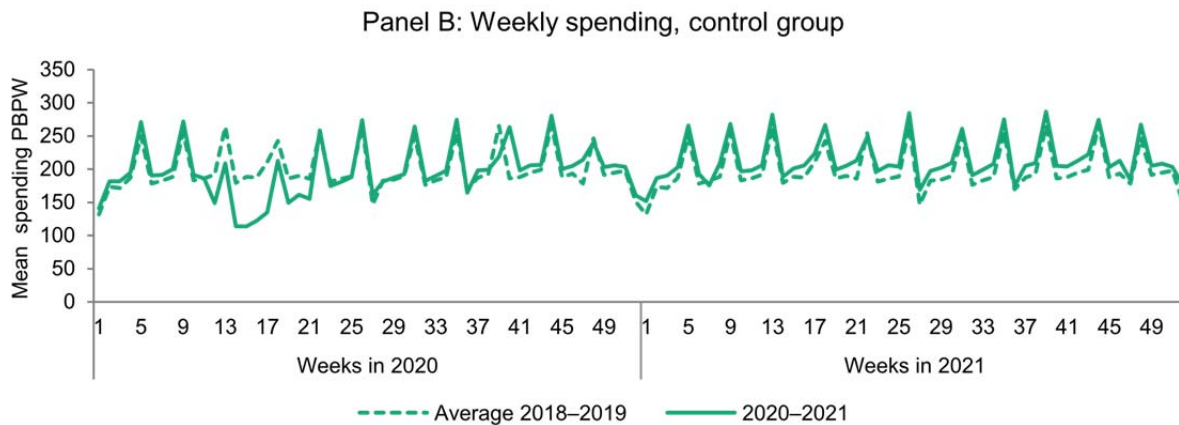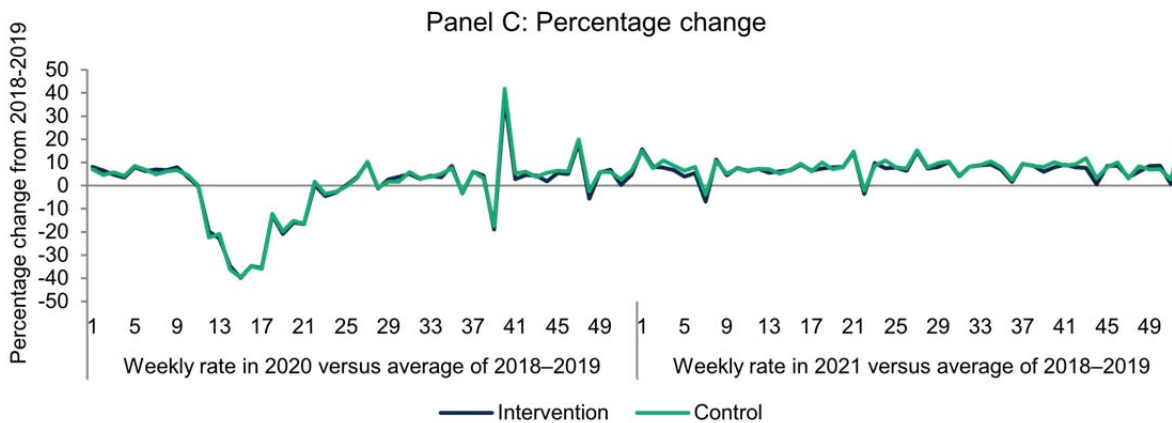

## Supplement: Effects of the Million Hearts Model

533 <sup>a</sup> As in eFigures 2 and 3, the figure reports the percentage change in weighted spending per person per week in 2020 and 2021  
534 versus the average rate for 2018 and 2019 for the same week for each group. To calculate each county's per-person per-week  
535 spending, the denominator for each week is the number of Medicare FFS beneficiaries in each county between the ages of 40 and  
536 79 who were alive and enrolled in Medicare Parts A and B FFS with Medicare as primary payer at the start of that week. The  
537 numerator is the total Medicare Parts A and B FFS spending during that week among the denominator population. Intervention  
538 group weekly spending rates are weighted by the number of intervention group beneficiaries in each county. (This figure effectively  
539 drops counties with no intervention group beneficiaries.) Similarly, control group weekly rates are weighted by the number of control  
540 group beneficiaries in each county. (This figure effectively drops counties with no control group beneficiaries.) Although outcome  
541 levels changed substantially between 2018–2019 and 2020–2021, those changes were extremely similar in regions inhabited by  
542 intervention versus control group beneficiaries. eTable 8 shows that observed intervention–control differences would have only a  
543 trivial influence on estimates of the model's effects.

544 We binned spending by week based on the claim through date, so claims paid monthly (for example, skilled nursing facility and  
545 hospice for beneficiaries using services all month) get binned on the last date of each month. This explains the monthly spikes in  
546 spending in Panels A and B of the figure.

547 The spike in Panel C in Week 40 of 2020 occurs because 2020 was a leap year; Week 40 of 2020 starts on September 30, 2020,  
548 whereas Week 40 starts on October 1 in 2018–2019. Together, these two factors lead to an artificial reduction in spending in Week  
549 39 in 2020, relative to 2018–2019, followed by an increase in spending in Week 40 in 2020 relative to 2018–2019, as the end-of-  
550 month expenditures for September are counted in Week 40 in 2020 rather than Week 39.

551 Abbreviations: FFS = fee-for-service; PBPW = per beneficiary per week.

552 **eTable 8. Projected influence of Covid-19 on Million Hearts Model effect estimates**

| Outcomes                                                                         | Estimated change in outcome due to Covid-19 |               |            | Potential bias on effect estimates from Covid-19  |                                                                                                                   | Conclusions about model effects, after accounting for potential bias from Covid-19 |
|----------------------------------------------------------------------------------|---------------------------------------------|---------------|------------|---------------------------------------------------|-------------------------------------------------------------------------------------------------------------------|------------------------------------------------------------------------------------|
|                                                                                  | Intervention group                          | Control group | Difference | Observed effect estimate from main study [90% CI] | Projected effect estimate, subtracting difference in outcomes that may be due to Covid-19 <sup>a</sup> , [90% CI] |                                                                                    |
| <b>Health events (no. per 1,000 person-years)</b>                                |                                             |               |            |                                                   |                                                                                                                   |                                                                                    |
| First-time myocardial infarctions, strokes, and TIAs (from Medicare claims only) | -1.24                                       | -1.33         | +0.09      | 0.967<br>(0.935 to 0.999)                         | 0.961 (0.930 to 0.992)                                                                                            | No change                                                                          |
| All-cause deaths (events per 1,000 beneficiaries per year)                       | 1.89                                        | 1.91          | -0.02      | 0.957<br>(0.930 to 0.984)                         | 0.957 (0.932 to 0.983)                                                                                            | No change                                                                          |
| <b>Medicare spending (\$ per beneficiary per month)</b>                          |                                             |               |            |                                                   |                                                                                                                   |                                                                                    |
| Total Medicare Parts A and B spending, before model payments                     | \$7.87                                      | \$10.56       | -\$2.70    | +\$0.87<br>(-\$17.91 to +\$19.64)                 | +\$3.56 (-\$15.16 to +22.29)                                                                                      | No change                                                                          |

553 <sup>a</sup> We took the differences in outcomes due to Covid-19 from eFigures 2–4 and subtracted them from the observed effect estimates from this study of Million Hearts Model effects,  
 554 converting to the hazard ratio scale for health events. This approximates the influence of Covid-19 on effect estimates, assuming the Million Hearts Model intervention and control  
 555 groups experienced the same changes in outcomes in 2020 and 2021 as all Medicare FFS beneficiaries ages 40 to 79 in the county.  
 556 Abbreviations: CI = confidence interval; FFS = fee-for-service.

- <sup>1</sup> Stewart K, Blue L, Kranker K, et al. Hospital use for myocardial infarction and stroke among Medicare beneficiaries from March to December 2020. *JAMA Cardiol* 2021. doi:10.1001/jamacardio.2021.2729.
- <sup>2</sup> Chronic Conditions Data Warehouse. CCW Chronic Conditions algorithms. 2022. Available at: <https://www2.ccwdata.org/web/guest/condition-categories-chronic>. Accessed February 13, 2023.
- <sup>3</sup> Thygesen K, Alpert JS, Jaffe AS, Chaitman BR, Bax JJ, Morrow DA, White HD, and Executive Group on behalf of the Joint European Society of Cardiology (ESC)/American College of Cardiology (ACC)/American Heart Association (AHA)/World Heart Federation (WHF) Task Force for the Universal Definition of Myocardial Infarction. Fourth Universal Definition of Myocardial Infarction (2018). *JACC* 2018;72. doi: 10.1016/j.jacc.2018.08.1038.
- <sup>4</sup> Andrade SE, Harrold LR, Tjia J, et al. A systematic review of validated methods for identifying cerebrovascular accident or transient ischemic attack using administrative data. *Pharmacoepidemiol Drug Saf*, 2012;21(Suppl 1):100-128. doi: 10.1002/pds.2312
- <sup>5</sup> Colantonio LD, Levitan EB, Yun H, et al. Use of Medicare claims data for the identification of myocardial infarction: the REasons for Geographic And Racial Differences in Stroke (REGARDS) Study. *Med Care* 2018;56(12):1051–1059. doi: 10.1097/MLR.0000000000001004
- <sup>6</sup> Psaty BM, Delaney JA, Arnold AM, et al. Study of Cardiovascular Health Outcomes in the Era of Claims Data: The Cardiovascular Health Study. *Circulation*, 2016;133(2):156–164. doi: 10.1161/CIRCULATIONAHA.115.018610
- <sup>7</sup> Xie F, Colantonio LD, Curtis JR, et al. Development of Algorithms for Identifying Fatal Cardiovascular Disease in Medicare Claims. *Pharmacoepidemiology Drug Saf* 2018;27(7):740–750. doi: [10.1002/pds.4421](https://doi.org/10.1002/pds.4421)
- <sup>8</sup> Halanych JH, Shuaib F, Parmar G, et al. Agreement on cause of death between proxies, death certificates, and clinician adjudicators in the Reasons for Geographic and Racial Differences in Stroke (REGARDS) study. *Am J Epidemiol* 2011;173:1319–1326.
- <sup>9</sup> Olubowale OT, Safford MM, Brown TM, et al. Comparison of expert adjudicated coronary heart disease and cardiovascular disease mortality with the National Death Index: Results from the REasons for Geographic and Racial Differences in Stroke (REGARDS) study. *J Am Heart Assoc* 2017;6:e004966.
- <sup>10</sup> Montgomery JR, Cain-Nelson AH, Jenkins PC, et al. Prevalence and payments for traumatic injury compared with common acute diseases by episode of care in Medicare beneficiaries, 2008-2014. *JAMA* 2019;321:2129-2131. doi: 10.1001/jama.2019.1146.
- <sup>11</sup> Sukul D, Seth M, Dupree JM, et al. Drivers of variation in 90-day episode payments after percutaneous coronary intervention. *Circ Cardiovasc Interv* 2019;12. doi: 10.1161/CIRCINTERVENTIONS.118.006928.
- <sup>12</sup> Sinha SS, Moloci NM, Ryan AM, et al. The effect of Medicare accountable care organizations on early and late payments for cardiovascular disease episodes. *Circ Cardiovasc Qual Outcomes* 2018;8:e004495. doi: 10.1161/CIRCOUTCOMES.117.004495.
- <sup>13</sup> Haas A, Elliott MN, Dembosky JW, et al. Imputation of race/ethnicity to enable measurement of HEDIS performance by race/ethnicity. *Health Serv Res* 2019;54:13-23. Available at: <https://doi.org/10.1111/1475-6773.13099>.
