# Supplementary material
Source: PubMed Central journal article supplement (PMC10582785)
Supplement: jama-e2319597-s003.pdf [file jama-e2319597-s003.pdf]

## Data Sharing Statement

Blue. Effects of the Million Hearts Model on Myocardial Infarctions, Strokes, and Medicare Spending. *JAMA*. Published October 17, 2023. doi:10.1001/jama.2023.19597

### Data

**Data available:** No

### Additional Information

**Explanation for why data not available:** The Innovation Center at the Centers for Medicare & Medicaid Services has already released the underlying data specific to the Million Hearts Model as a series of Research Identifiable Files. The data from the trial is released as a suite of seventeen linked data files. These data include detailed information about the beneficiaries, physician practices, specific providers and clinic visits. The data can be linked to other CMS files through the CCW beneficiary ID to identify study outcomes, such as first-time heart attacks and strokes. Details are available online at <https://resdac.org/node/5941>.
